# Supplementary material for: The Lateral Metalation of Isoxazolo[3,4-d]pyridazinones towards Hit-to-Lead Development of Selective Positive Modulators of Metabotropic Glutamate Receptors
Source: MDPI journal article supplement (doi:10.3390/molecules28196800), 2023-09-25

## Article

# The lateral metalation of isoxazolo[3,4-d]pyridazinones towards hit-to-lead development of selective positive modulators of metabotropic glutamate receptors

Christina A. Gates <sup>1</sup>, Donald S. Backos,<sup>2</sup> Philip Reigan,<sup>2</sup> and Nicholas R. Natale <sup>1,\*</sup>

<sup>1</sup> University of Montana, Department of Biomedical and Pharmaceutical Sciences, 32 Campus Drive, Missoula MT 59812; christina.gates@umconnect.umt.edu

<sup>2</sup> Skaggs School of Pharmacy and Pharmaceutical Sciences, Anschutz Medical Campus, University of Colorado Denver, Aurora, CO 80045, United States; philip.reigan@cuanschutz.edu

\* Correspondence: nicholas.natale@umontana.edu; Tel.: (406)-243-4132

## Table of contents

1. General Experimental and larger version of **Scheme S1**...pp.1.2
2. Characterization of **3a**, **3c**, **3d**, **3f**, **3g**, **3h**, **4d** and **4e**...pp. 3-17
3. **Table S1**. 4-phenyl series of [3,4-d] analogs...pp.18-19
4. Characterization of **2j** through **2n**....pp. 19-31

## General Experimental

Starting materials and were prepared according to dal Piaz, The isoxazole acetal was prepared as we have previously described (Zhou, 1998; and Burkhart, 2001)

The regiochemistry of the [3,4-d]metalation was established by single crystal x-ray diffractometry (Campana, 2013)

Tetrahydrofuran (THF) was dried over activated sieves then distilled from sodium and benzophenone. Argon gas was passed through tubes with indicator Drierite for reactions which required an inert atmosphere. NMR spectra were recorded at 400 MHz, unless otherwise specified, in CDCl<sub>3</sub> solution and are reported in ppm. The mass spectra were obtained using chemical ionization unless otherwise noted and are reported as m/Z (relative intensity). Starting materials for the lateral metalation was prepared via Dal Piaz's method for 4-phenyl and 4-methyl 3,4-ds (citation).

All steps were performed under inert atmosphere unless otherwise noted. To pre-dried round bottom cooled under argon the 3,4-d was added. After which dry THF was added in sufficient amount to reach a concentration of 50mM. The reaction was then placed and stirred in a cooling bath at the desired reaction temperature or based on solubility for 5min. Then 1 or 2 eq of the amine base was added via syringe dropwise over 5 min. The reaction mixture was then allowed to react for 30min, during which time the solution is usually observed to darken. Then add 1 or 2eq of a 1.7M solution of the electrophile in dry THF that has been cooled to 0°C or -78°C (done for 3,5-Cl<sub>2</sub>) dropwise slowly. Allow to warm to room temperature, adding saturated ammonium chloride at about -20°C and allow to finish warming to room temperature. Concentration by rotary evaporator, dissolution in dichloromethane (DCM) and washed with water and brine was performed. The DCM layer was dried over sodium sulfate overnight. The Solution was then filtered and concentrated by rotary evaporator ,and purified by either PTLC or column with 6:1:1 hexanes, ethyl acetate, DCM.

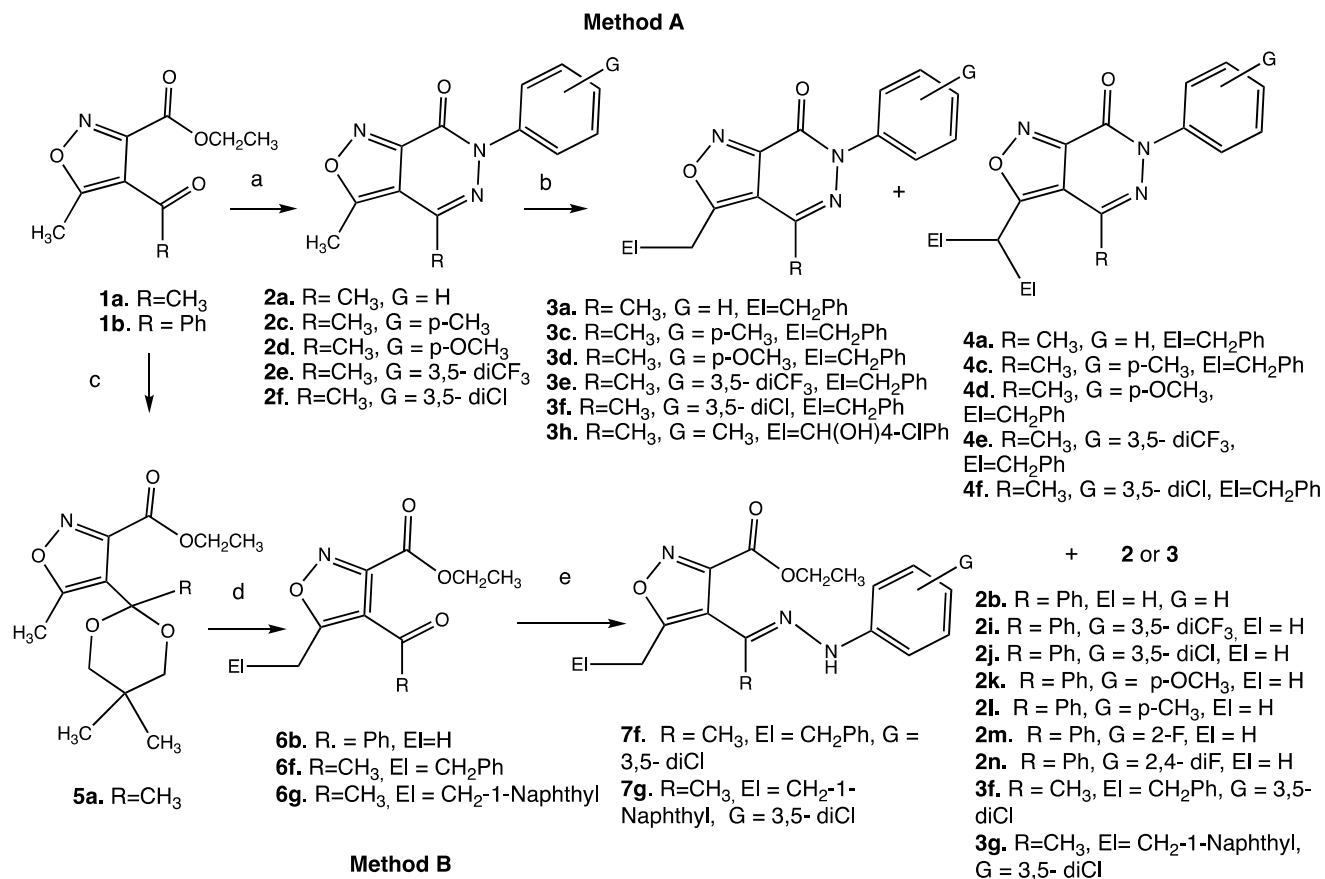

Scheme S1. Larger version of the Scheme

**3-Phenylethyl, 4-methyl,6-phenylisoxazolo[3,4-*d*]pyridazin-7(6*H*)-one, 3a.**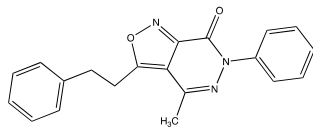**A. <sup>1</sup>H NMR**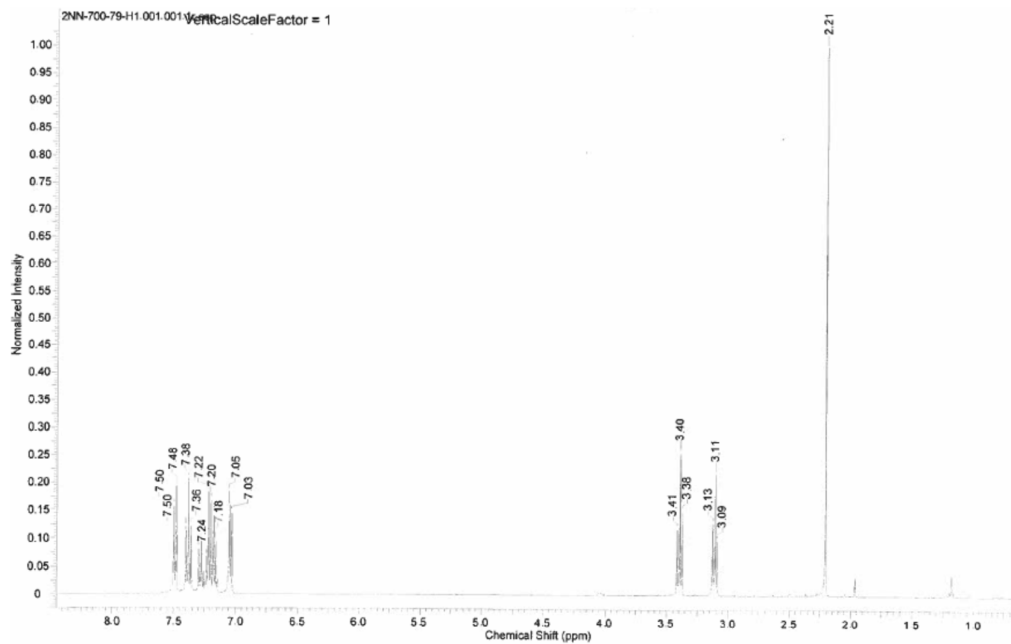**C. <sup>13</sup>C NMR**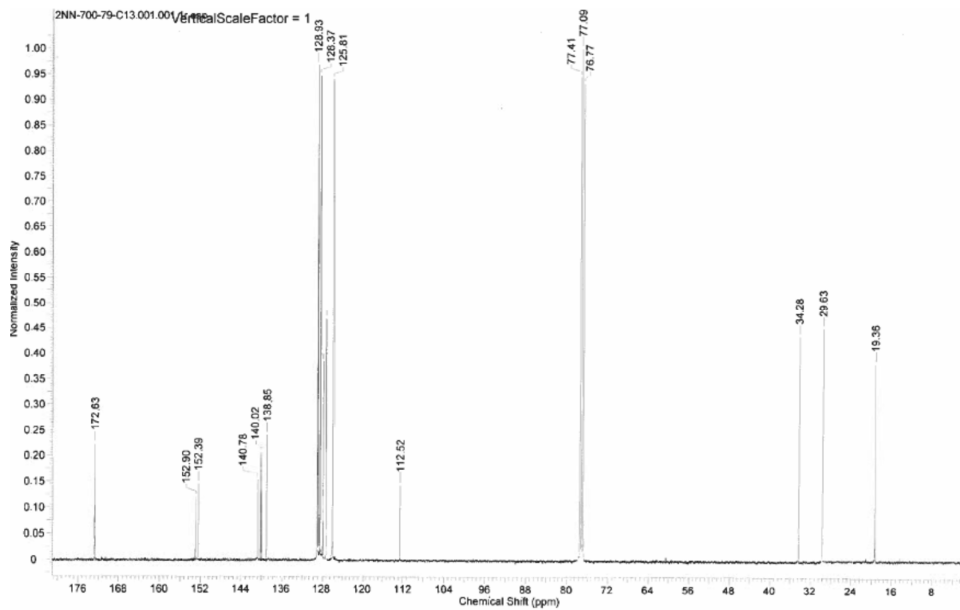**D. <sup>13</sup>C NMR zoom**

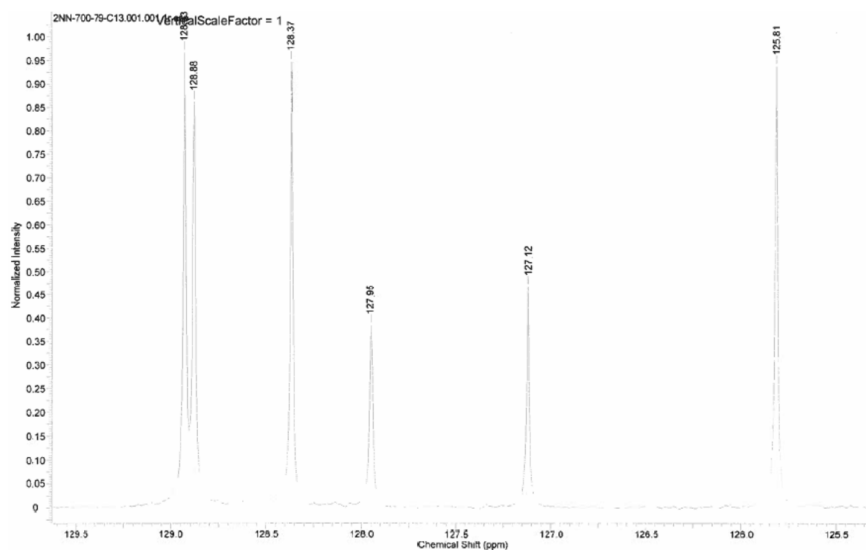

**3-(2-(4-chlorophenyl)-2-hydroxyethyl)-4-methyl-6-(p-tolyl)isoxazolo[3,4-d]pyridazin-7(6H)-one. 3h.**

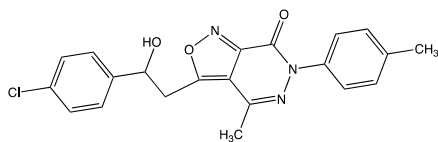

TLC (SiO<sub>2</sub> 4:4:1 hexane-EtOAc-DCM) R<sub>f</sub> 0.16. <sup>1</sup>H NMR (500 MHz, CDCl<sub>3</sub>): δ 7.42 (d, J = 8.5 Hz, 2H); 7.259 (m, 4H); 7.08 (d, J=8.5 Hz, 2H); 5.1 (br. m., 1H); 4.04 (dd, J= 7Hz); 3.69 (dd, J = 15, 7Hz, 1H); 3.62 (dd, J= 7, 15 Hz); 2.40 (s, 3H); 2.386 (s, 3H). <sup>13</sup>C NMR: 169.51, 152.46, 138.87, 138.11, 138.01, 137.90, 134.37, 129.63, 129.51, 128.18, 125.55, 113.12, 43.19, 33.30, 21.13, 19.58. C<sub>21</sub>H<sub>18</sub>ClN<sub>3</sub>O<sub>3</sub> MW 395.1; ESI-MS m/z 378.0079 (<sup>35</sup>Cl, M-OH<sup>+</sup>, 47% rel. I.), 379.9991 (<sup>37</sup>Cl, M-OH<sup>+</sup>, 15% rel. I.).

**A. <sup>1</sup>H NMR**

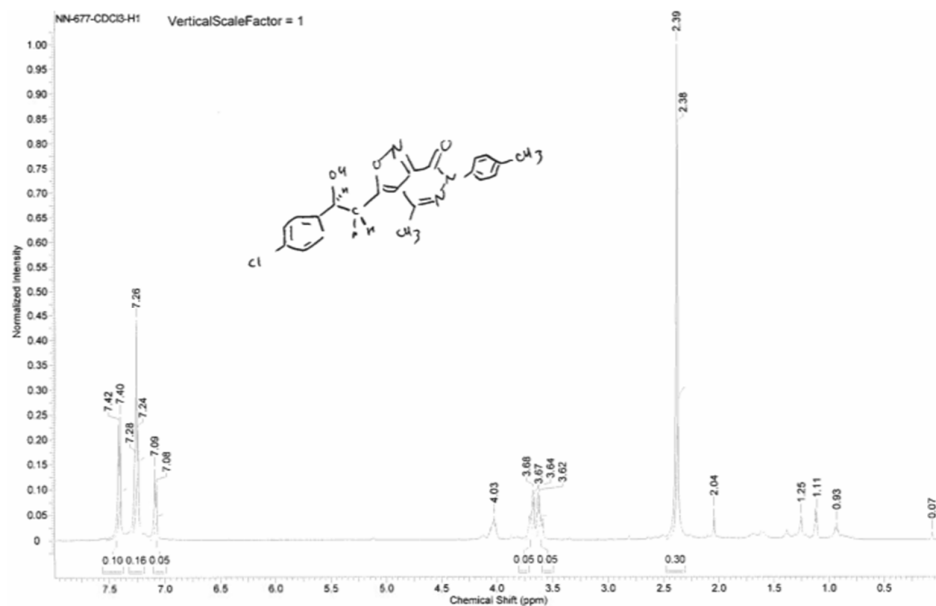

B. Expansion of  $^1\text{H}$  NMR of hydroxy ethylene moiety of **3h**.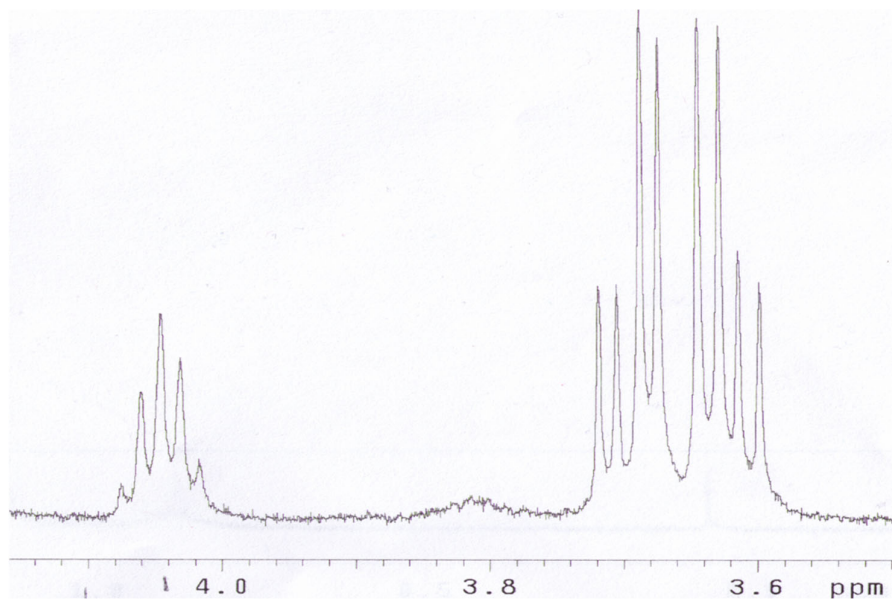C.  $^{13}\text{C}$  NMR of **3h**.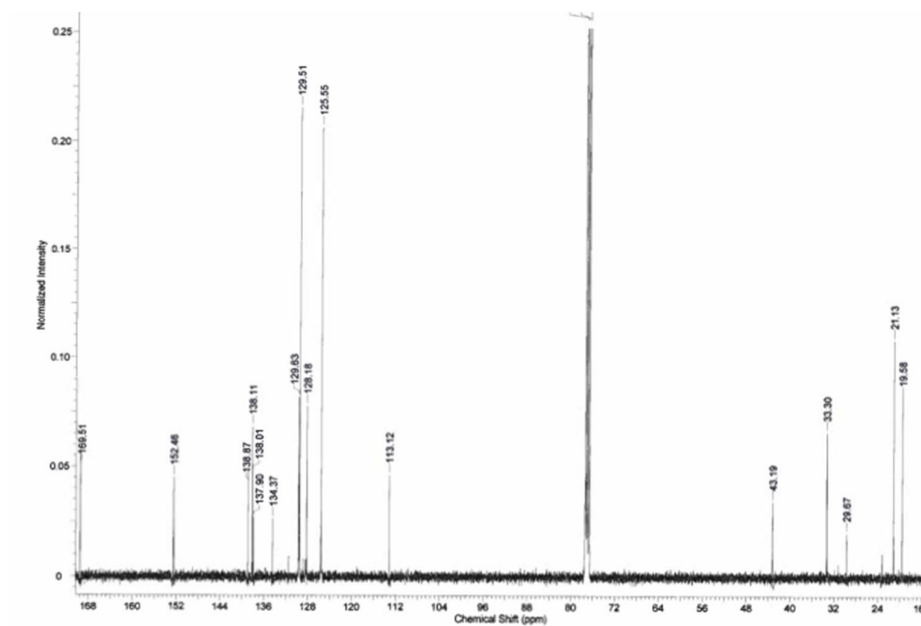3. 4-methyl-3-phenethyl-6-(p-tolyl)isoxazolo[3,4-d]pyridazin-7(6H)-one **3c**.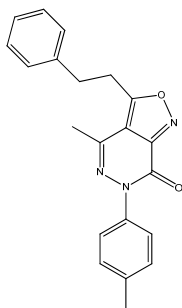

$^1\text{H}$  NMR (400 MHz,  $\text{CDCl}_3$ ):  $\delta$  7.29 (d,  $J=8$  Hz, 2H); 7.12 (m, 5H); 6.97 (d,  $J=8$  Hz, 2H); 3.32 (t,  $J=8$  Hz, 2H); 3.03 (t,  $J=8$  Hz, 2H); 2.24 (s, 3H); 2.14 (s, 3H).  $^{13}\text{C}$  NMR: 172.44, 152.86, 152.35, 139.73, 138.79, 138.23, 137.91, 129.46, 128.88, 128.30, 127.06, 125.58, 112.49, 34.25, 29.58, 21.13, 19.30.  $\text{C}_{21}\text{H}_{19}\text{N}_3\text{O}_2$  MW 345.39; ESI-MS  $m/z$  346.1176 ( $\text{M}+1^+$ , 100% rel. I.). HRMS: calc'd for  $\text{C}_{21}\text{H}_{20}\text{N}_3\text{O}_2$  ( $\text{M}+\text{H}^+$ ): 346.1556, found: 346.1558. 0.6 ppm.

#### A. $^1\text{H}$ NMR

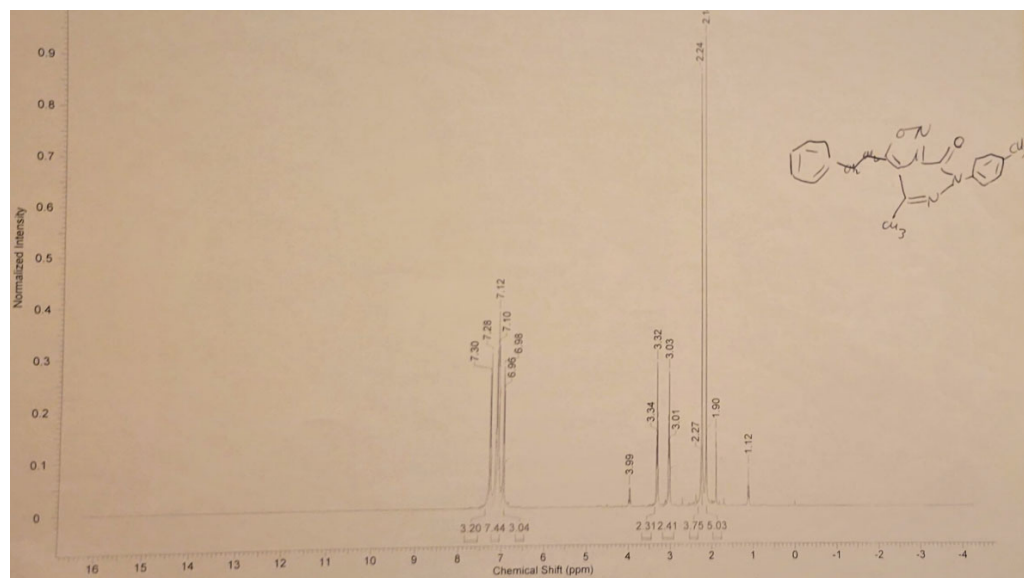

#### C. $^{13}\text{C}$ NMR

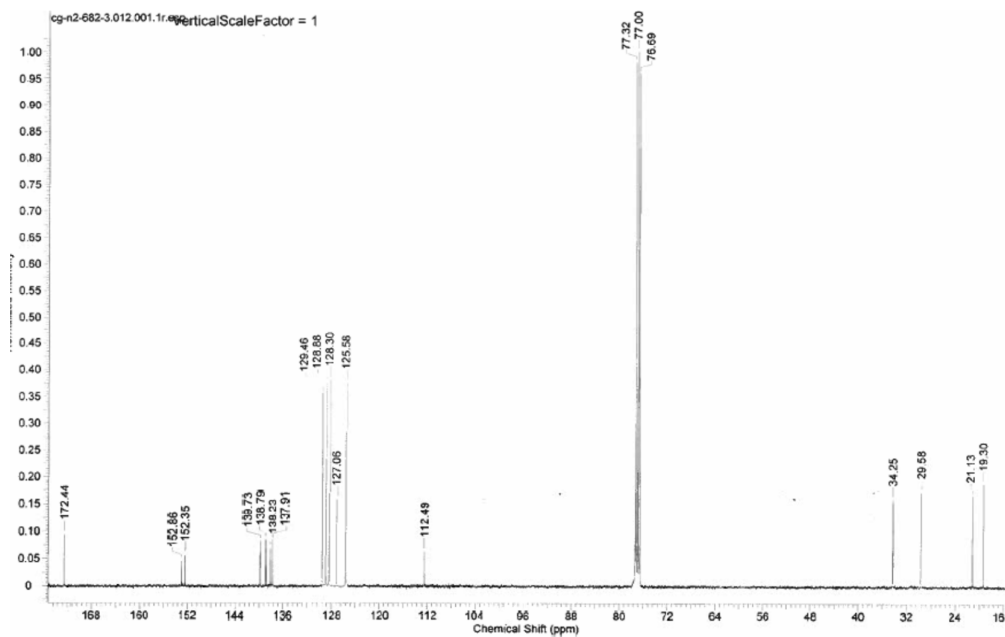

#### D. $^{13}\text{C}$ NMR zoom

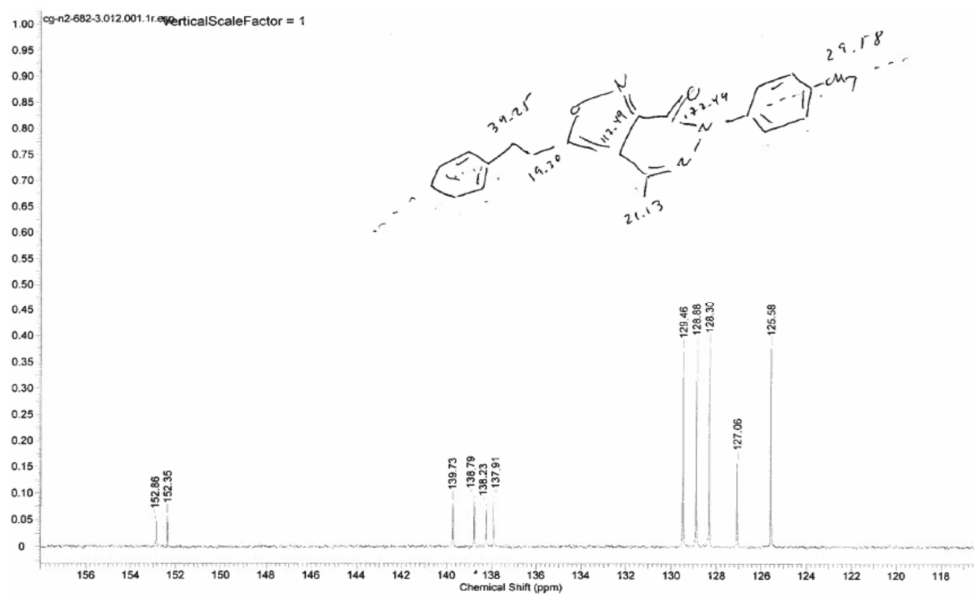

#### 4. 6-(p-methoxyphenyl)-4-methyl-3-phenethyl-isoxazolo[3,4-d]pyridazin-7(6H)-one, 3d.

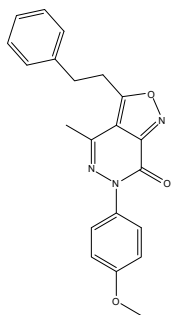

**3d.**  $^1\text{H}$  NMR (400 MHz,  $\text{CDCl}_3$ ):  $\delta$  7.385 (d,  $J = 8\text{ Hz}$ , 2H); 7.16–7.22 (m, 3H); 7.7.65 (d,  $J = 8\text{ Hz}$ , d); 6.89 (d,  $J = 8\text{ Hz}$ , 2H); 3.73 (s, 3H); 3.38 (t,  $J = 8\text{ Hz}$ , 2H); 3.11 (t,  $J = 8\text{ Hz}$ , 2H); 2.20 (s, 3H).  $^{13}\text{C}$  NMR: 172.57, 159.03, 152.95, 152.37, 139.80, 138.86, 133.77, 128.91, 127.05, 114.13, 55.58, 34.27, 29.62, 19.35.  $\text{C}_{21}\text{H}_{19}\text{N}_3\text{O}_3$  MW: 361.3. HRMS calc'd for  $\text{C}_{21}\text{H}_{20}\text{N}_3\text{O}_3$  ( $\text{M} + \text{H}^+$ ): 362.1505, found: 362.1506. 0.3 ppm.

##### A. $^1\text{H}$ NMR

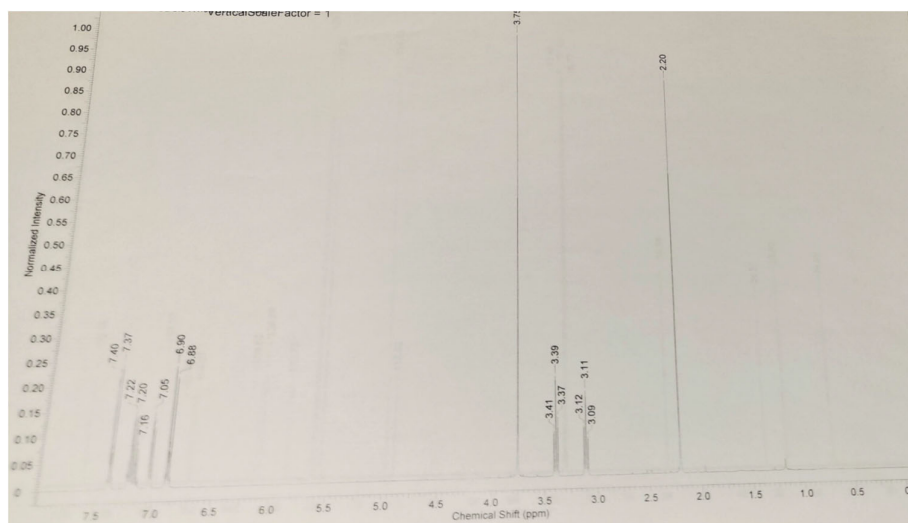

**B.  $^{13}\text{C}$  NMR**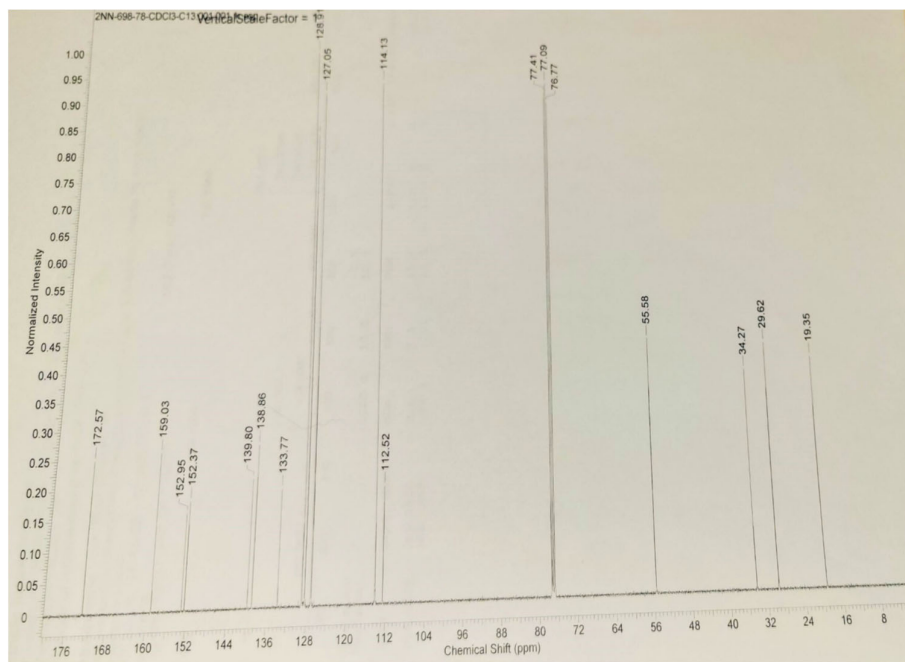

**6. 6-(p-methoxyphenyl)-3-(1,3-diphenylpropan-2-yl)-4-methyl-isoxazolo[3,4-d]pyridazin-7(6H)-one, 4d.**

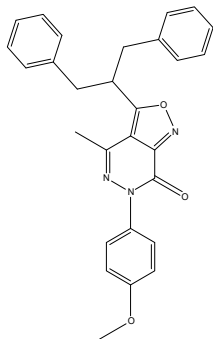

4.d.  $^1\text{H}$  NMR (400 MHz,  $\text{CDCl}_3$ ):  $\delta$  7.41 (d,  $J=8\text{Hz}$ , 2H); 7.19–7.25 (m, 6H); 7.19 (d,  $J=8\text{Hz}$ , 4H); 6.94 (d,  $J=8\text{Hz}$ , 2H); 3.83 (s, 3H); 3.81 (pentet,  $J = 8\text{Hz}$ , 1H); 3.28 (d,  $J=8\text{Hz}$ , 4H); 1.85 (s, 3H).  $^{13}\text{C}$  NMR: 174.46, 158.96, 152.91, 151.94, 139.62, 138.03, 133.65, 128.82, 128.59, 126.93, 114.06, 113.43, 55.55, 45.01, 40.82, 18.96.  $\text{C}_{28}\text{H}_{25}\text{N}_3\text{O}_3$  MW: 451.5. HRMS calc'd for  $\text{C}_{28}\text{H}_{26}\text{N}_3\text{O}_3$  ( $\text{M}+\text{H}^+$ ): 452.1974, Found: 452.1975. 0.2 ppm.

**A.  $^1\text{H}$  NMR**



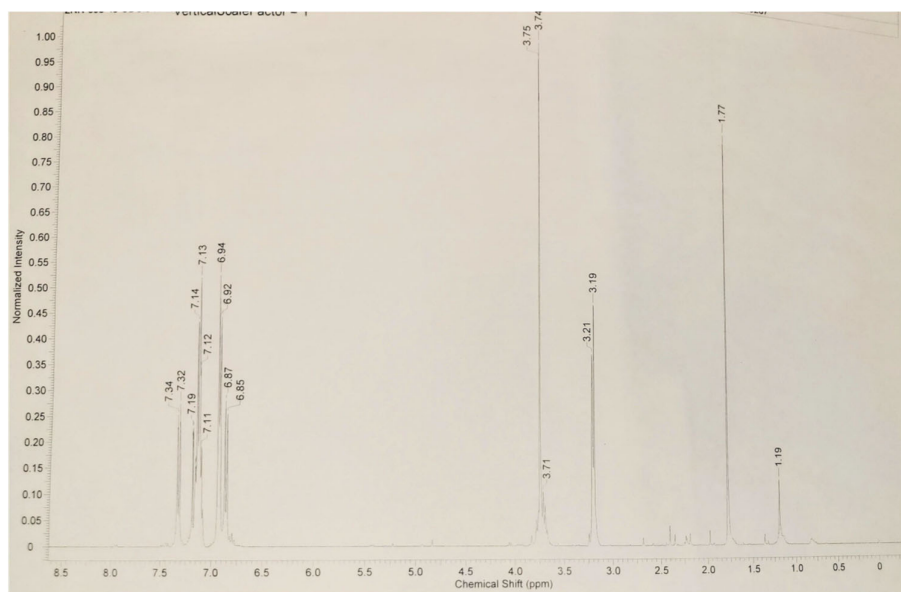

### B. <sup>13</sup>C NMR

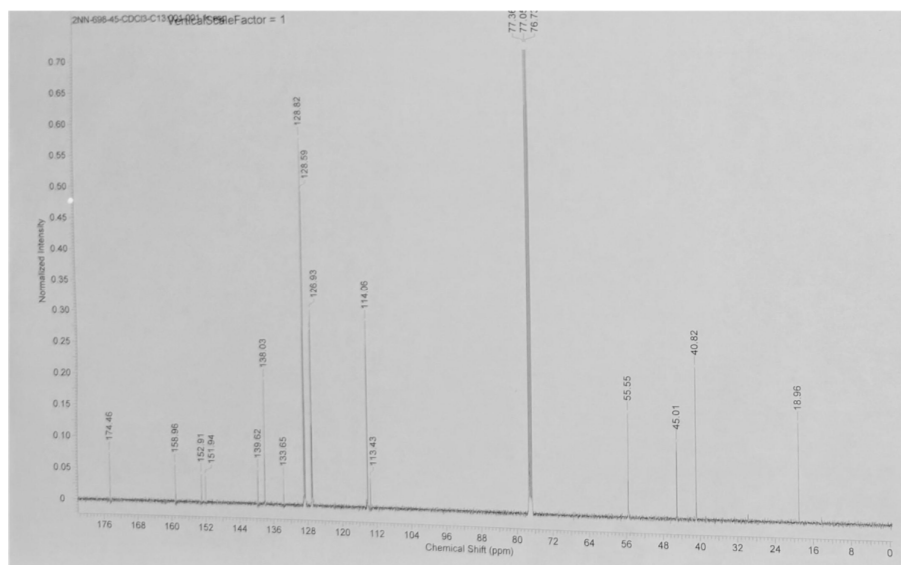

### 7. 6-(3,5-dichlorophenyl)-4-methyl-3-phenethylisoxazolo[3,4-d]pyridazin-7(6H)-one, 3f.

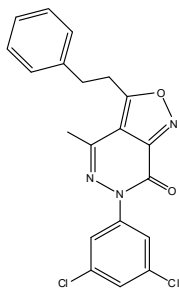

<sup>1</sup>H NMR (400 MHz, CDCl<sub>3</sub>):  $\delta$  7.515 (d,  $J$  = 4 Hz, 2H); 7.18–7.27 (m, 5H); 7.04 (d, 1H); 3.41 (t, 3  $J$  = 8 Hz, 2H); 3.12 (t, 3  $J$  = 8 Hz, 2H); 2.2 (s, 3H). <sup>13</sup>C NMR: 173.01, 152.72; 151.99; 142.12; 140.88; 138.62; 134.81; 128.91; 128.28; 127.15; 124.20; 112.29; 34.20; 29.61; 19.26. C<sub>20</sub>H<sub>15</sub>Cl<sub>2</sub>N<sub>3</sub>O<sub>2</sub> MW: 400.26; ESI-MS  $m/z$  400 ( $M+H$ , 100% rel. I.); 402 ( $M+H+2$ , 67.7); 404 ( $M+H+4$ , 12.2). HRMS Calc'd for C<sub>20</sub>H<sub>16</sub>Cl<sub>2</sub>N<sub>3</sub>O<sub>2</sub> 400.0620, Found: 400.0622. 0.5 ppm.

**A.  $^1\text{H}$  NMR**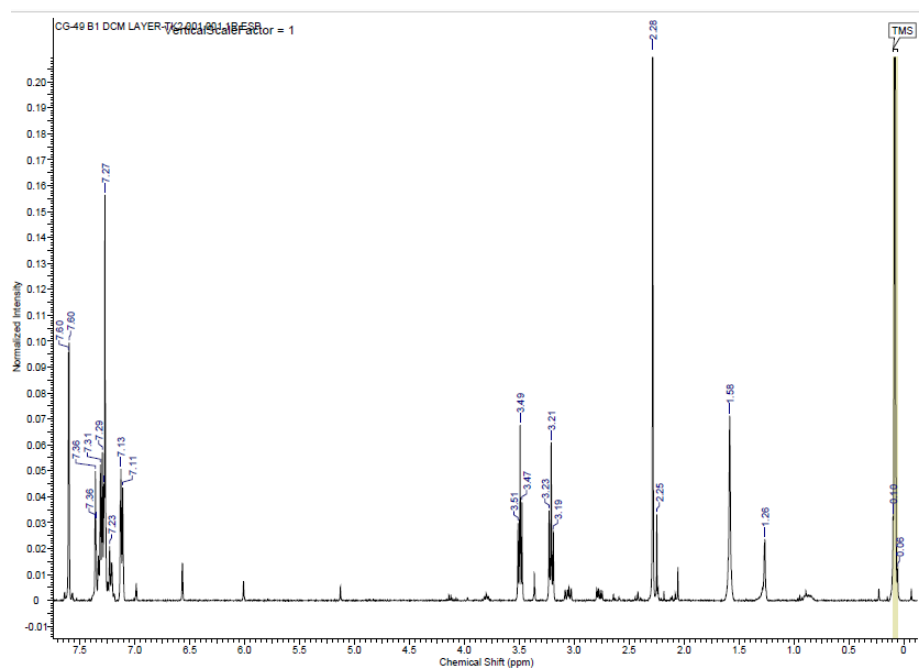**B.  $^1\text{H}$  NMR Aromatic expanded**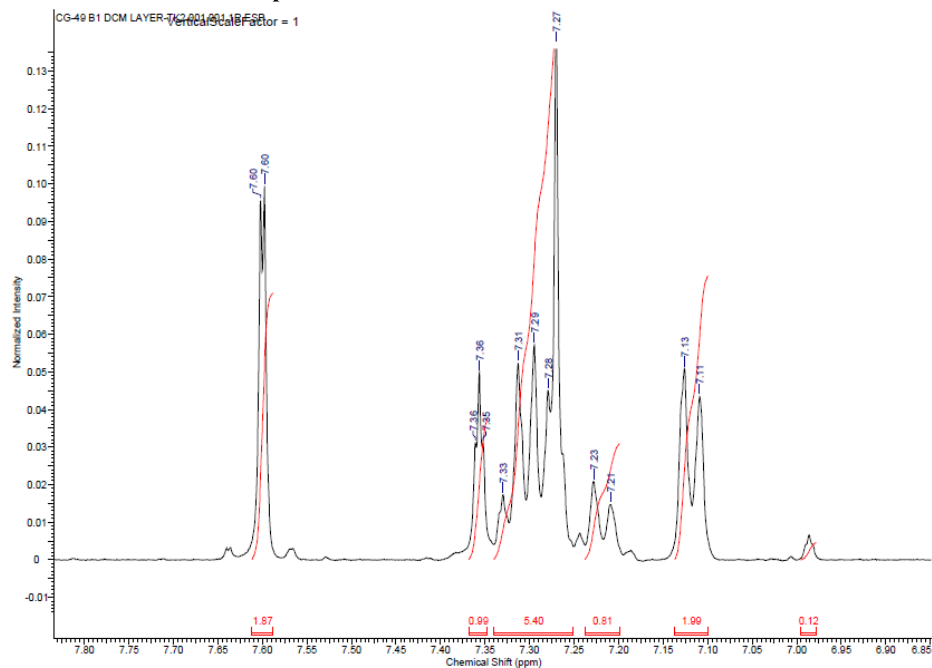**C.  $^{13}\text{C}$  NMR**

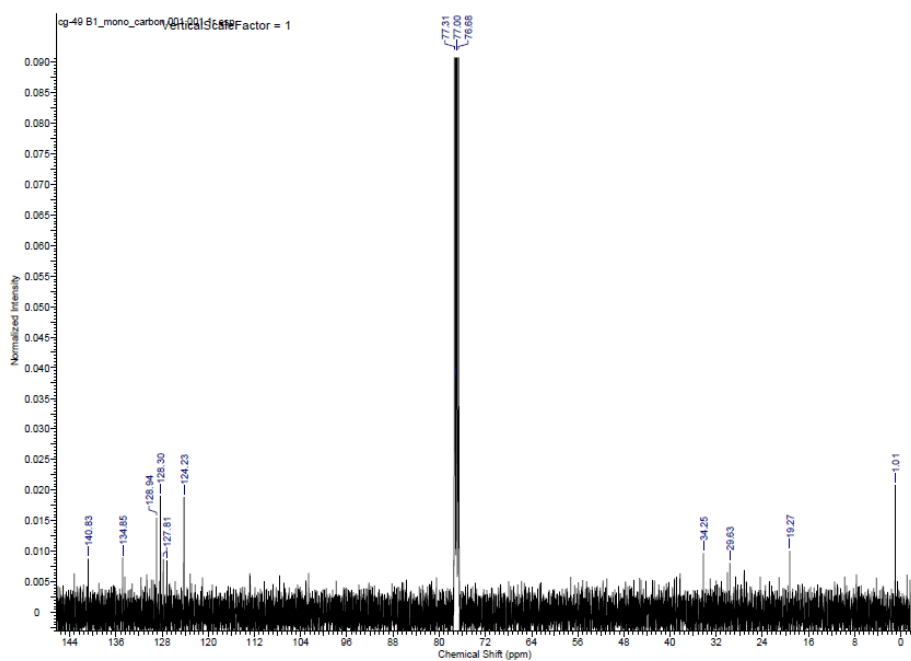

D.  $^{13}\text{C}$  NMR zoom

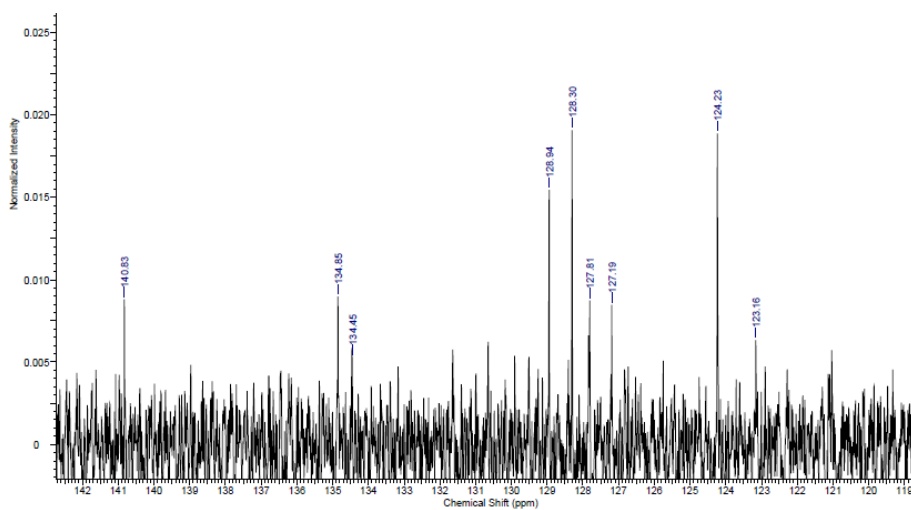

13. (E)-ethyl-4-(1-(2-(3,5-dichlorophenyl)hydrazono)ethyl)-5-phenethylisoxazole-3-carboxylate, open precursor to 4f.

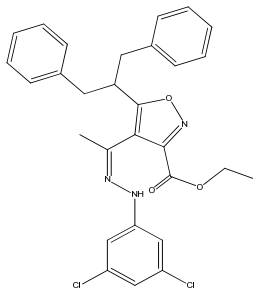

. 7.f.  $^1\text{H}$  NMR (400 MHz,  $\text{CDCl}_3$ ):  $\delta$  4.34 (q,  $J$  = 8 Hz, 2H); 3.17 (t, 2H); 2.98 (t, 2H); 1.80 (s, 3H); 1.32 (t,  $J$  = 8 Hz, 3H).  $\text{C}_{22}\text{H}_{21}\text{Cl}_2\text{N}_3\text{O}_3$  MW: 446.3; ESI-MS  $m/z$  446 ( $\text{M}+1^+$ , 100% rel. I.), 448 ( $\text{M}+3^+$ , 67.4).

**8. 6-(3,5-dichlorophenyl)-4-methyl-3-(1,3-diphenylpropan-2-yl)-isoxazolo[3,4-*d*]pyridazin-7(6H)-one, 4f.**

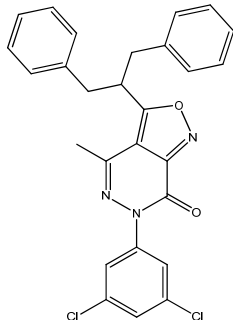

4.f.  $^1\text{H}$  NMR (400 MHz,  $\text{CDCl}_3$ ):  $\delta$  7.532 (d,  $J$  = 1.7 Hz, 2H); 7.32 (t,  $J$  = 1.7(x2), 1H); 7.25-7.19 (m, 6H); 7.01-6.99 (d,  $J$  = 6.4 Hz, 4H); 3.81-3.77 (t, 3  $J$  = 8 Hz (x2), 1H); 3.30 (s, 2H); 3.28 (s, 2H); 1.85 (s, 3H); 1.59 (s, 1H).  $^{13}\text{C}$  NMR: 174.99; 140.68; 137.87; 134.75; 128.84; 128.50; 127.16; 124.11; 45.15; 40.83; 18.88  $\text{C}_{27}\text{H}_{21}\text{Cl}_2\text{N}_3\text{O}_2$  MW: 490.39; HRMS 489 ( $\text{M}-\text{H}$ , 100% rel. I.); 491 ( $\text{M}+\text{H}$ ). Calc'd for  $\text{C}_{27}\text{H}_{21}\text{Cl}_2\text{N}_3\text{O}_2$  490.3805, Found: 490.1226.

**A.  $^1\text{H}$  NMR**

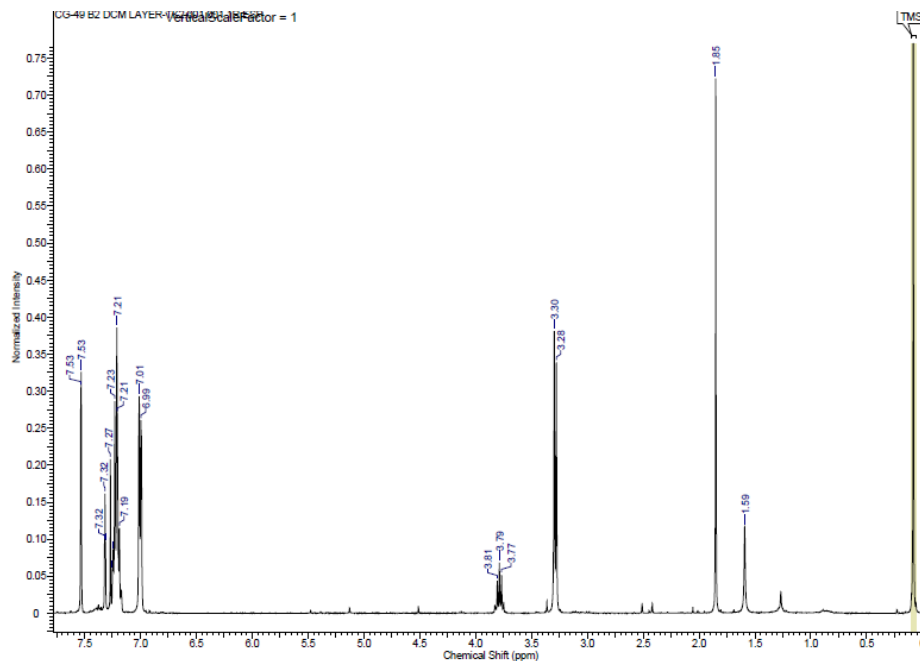

**B.  $^1\text{H}$  NMR Aromatic expanded**

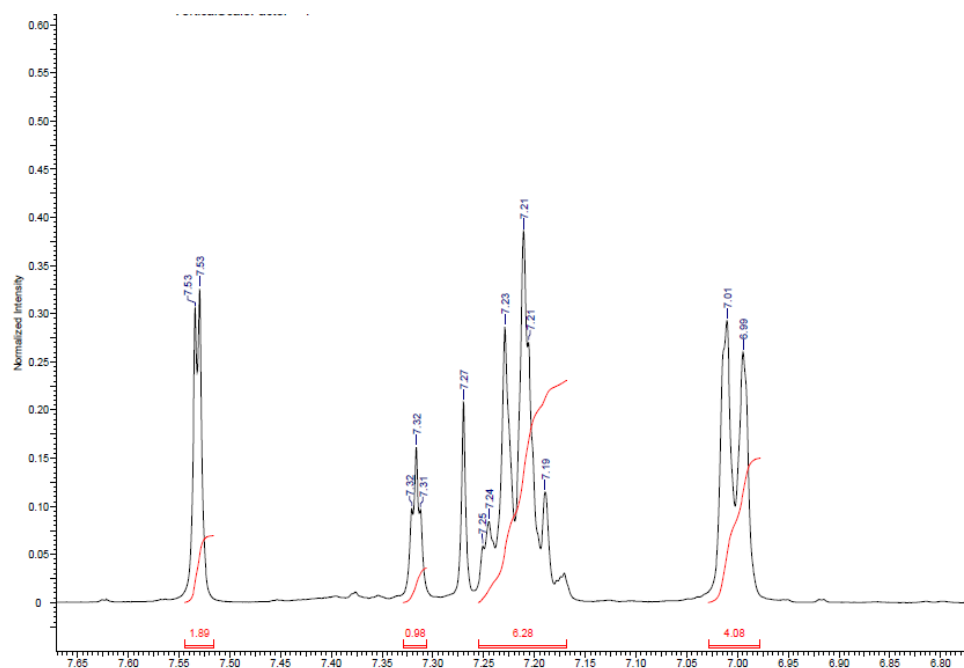

### C. $^{13}\text{C}$ NMR

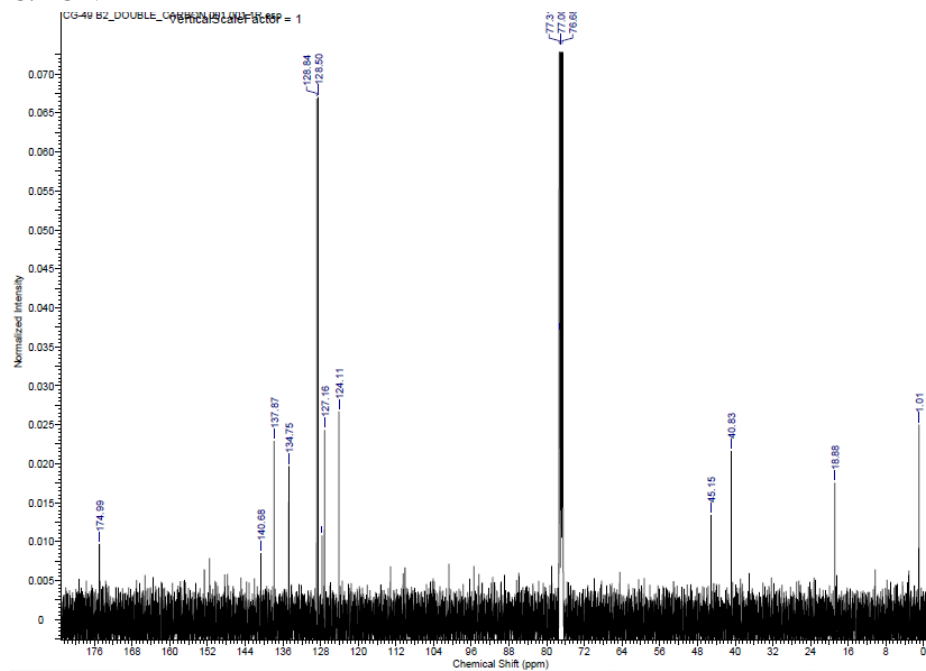

### D. $^{13}\text{C}$ NMR zoom

10. 6-(3,5-bis(trifluoromethyl)phenyl)-4-methyl-3-(1,3-diphenylpropan-2-yl)-isoxazolo[3,4-d]pyridazin-7(6H)-one, **4e**.

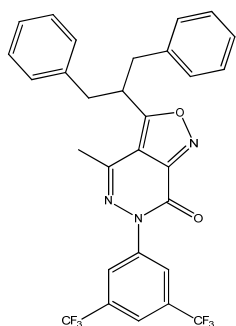

4.e.  $^1\text{H}$  NMR (400 MHz,  $\text{CDCl}_3$ ):  $\delta$  8.13 (s, 2H); 7.82 (s, 1H); 7.04 (d, 1H); 7.25–7.18 (m,  $J = 8\text{ Hz}$ , 6H); 7.02–7.00 (d,  $J = 8\text{ Hz}$ , 4H); 3.82–3.79 (m, 1H); 3.31 (s, 2H); 3.29 (s, 2H); 1.88 (s, 3H); 1.6 (s, 1H).  $^{13}\text{C}$  NMR 175.27, 137.82, 128.86, 128.48, 127.17, 113.23, 45.23, 18.90,  $\text{C}_{29}\text{H}_{21}\text{F}_6\text{N}_3\text{O}_2$  MW: 557.49; HRMS  $m/z$  558 ( $\text{M}+\text{H}$ , 100% rel. I.); 559 ( $\text{M}+\text{H}+2$ ); Calc'd for  $\text{C}_{29}\text{H}_{21}\text{F}_6\text{N}_3\text{O}_2$  557.49, Found: 557.1153.

#### A. $^1\text{H}$ NMR

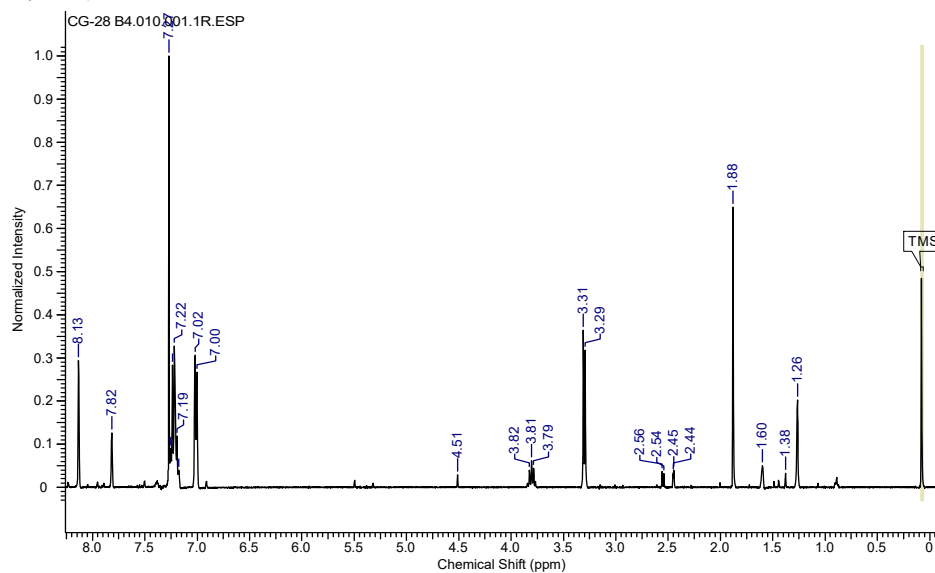

#### B. $^1\text{H}$ NMR Aromatic expanded

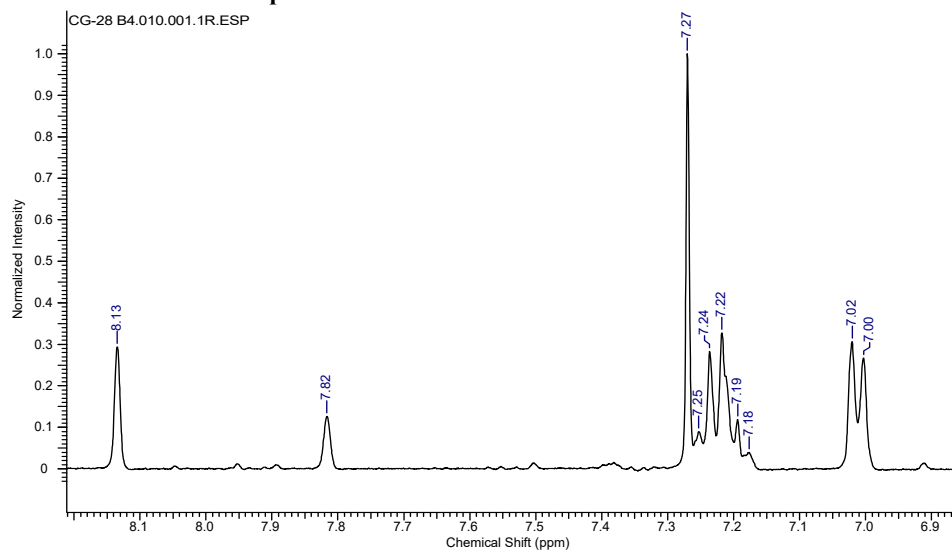

#### C. $^{13}\text{C}$ NMR

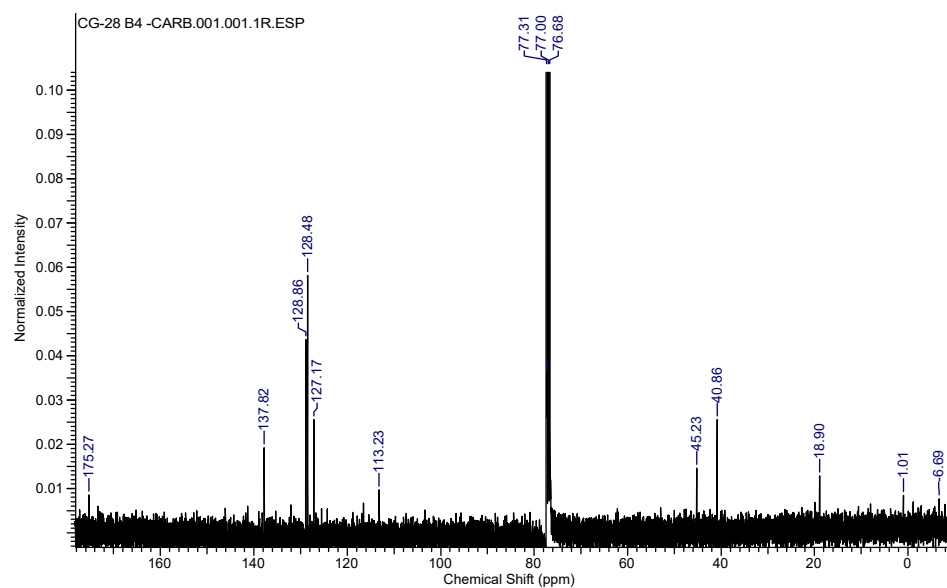

#### D. $^{13}\text{C}$ NMR zoom

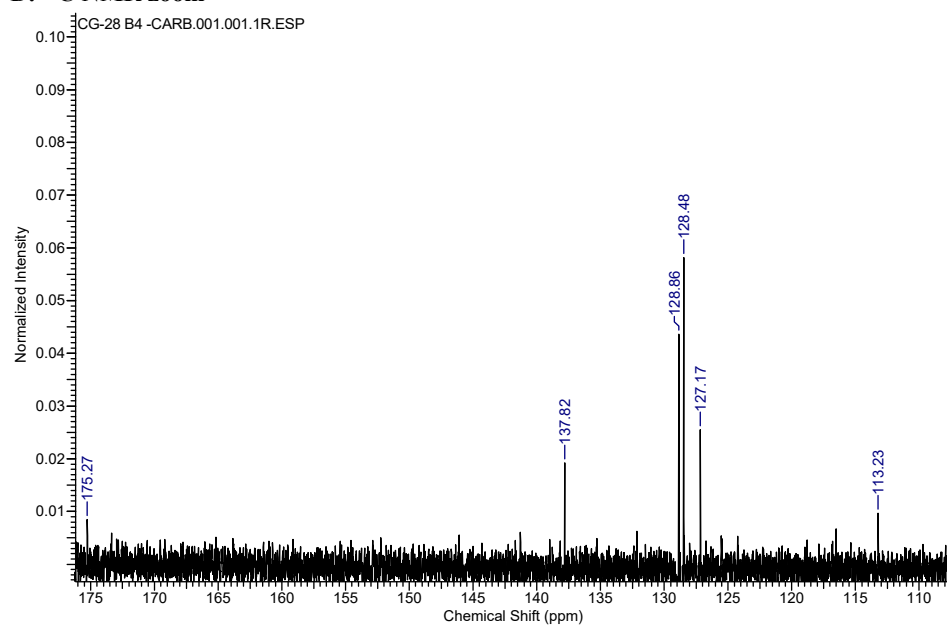

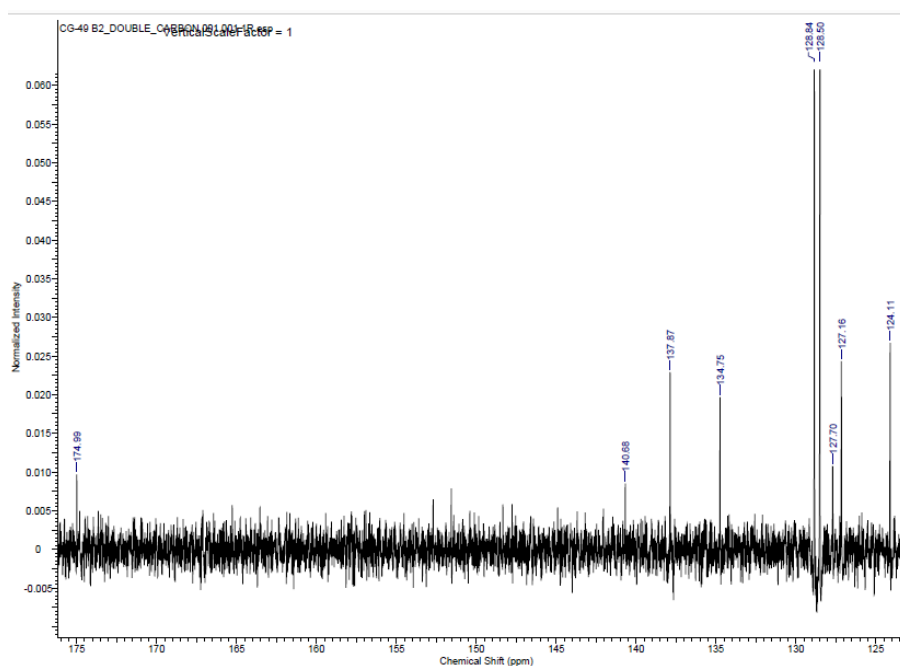

14. 6-(3,5-dichlorophenyl)-4-methyl-3-(2-(naphthalen-1-yl)ethyl)isoxazolo[3,4-d]pyridazin-7(6H)-one, 3g.

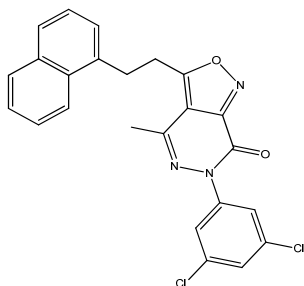

3g.  $^1\text{H}$  NMR (400 MHz,  $\text{CDCl}_3$ ):  $\delta$  7.96 (d,  $J$  = 8 Hz, 1H); 7.90 (d,  $J$  = 8 Hz, 1H); 7.79 (d,  $J$  = 8 Hz, 1H); 7.37-7.61 (m, 1H); 7.56 (d,  $J$  = 2 Hz, 2H); 7.35 (t, 1H); 7.35 (d,  $J$  = 2 Hz, 1H); 7.21 (d,  $J$  = 8 Hz, 1H); 3.675 (dd, 2H); 3.64 (dd, 2H); 2.00 (s, 3H).  $^{13}\text{C}$  NMR:  $\delta$  172.98, 152.67, 152.0, 142.11, 140.73, 134.83, 134.57, 131.20; 129.26, 127.0, 126.65, 125.57, 124.22, 122.62, 112.46, 31.42, 28.65, 18.92.  $\text{C}_{24}\text{H}_{17}\text{Cl}_2\text{N}_3\text{O}_2$  MW: 450.32; ESI-MS  $m/z$  450 ( $\text{M}+\text{H}$ , 100% rel. I.); 452 ( $\text{M}+\text{H}+2$ , 68.9); 452 ( $\text{M}+\text{H}+4$ , 13.1). HRMS Calc'd for  $\text{C}_{24}\text{H}_{18}\text{Cl}_2\text{N}_3\text{O}_2$  450.0776, Found: 450.0775. -0.2 ppm.

#### A. $^1\text{H}$ NMR



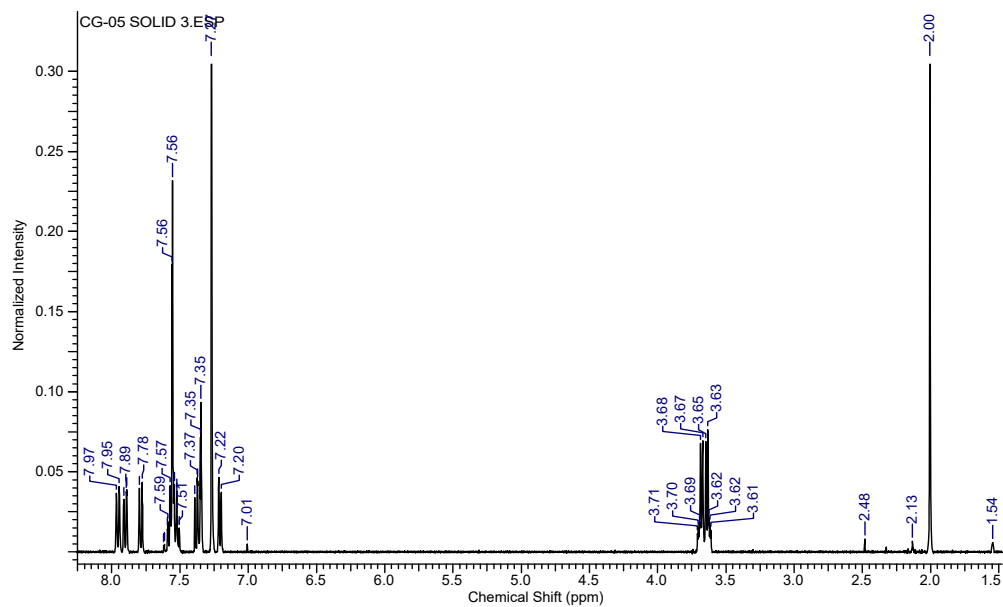**B.  $^1\text{H}$  NMR Aromatic expanded**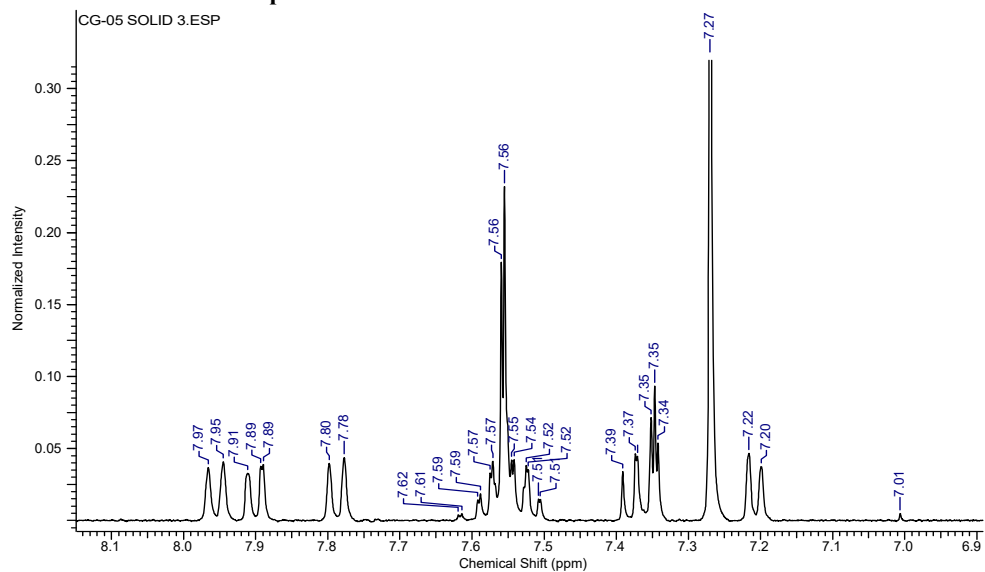**C.  $^{13}\text{C}$  NMR**

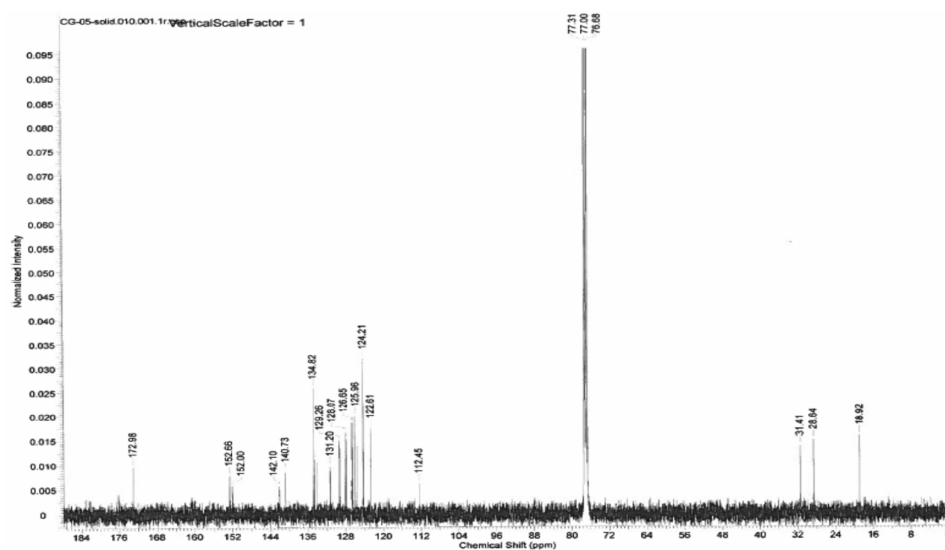

**Table S1.** 4-phenyl series of [3,4-d] analogs

|                                        |                                                                                     |                                                                                                            |
|----------------------------------------|-------------------------------------------------------------------------------------|------------------------------------------------------------------------------------------------------------|
| <p><b>2j</b><br/>cg-15;17;25;33;36</p> | 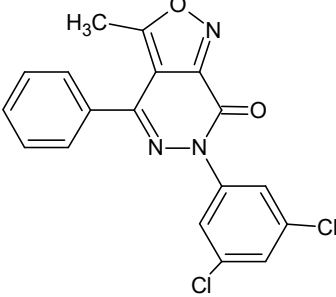   | <p>212.5</p> <p>Molecular Formula = <math>C_{18}H_{11}Cl_2N_3O_2</math><br/>Formula Weight = 372.20484</p> |
| <p><b>2i</b><br/>cg-19;34;35</p>       |    | <p>205</p> <p>Molecular Formula = <math>C_{20}H_{11}F_6N_3O_2</math><br/>Formula Weight = 439.3106592</p>  |
| <p><b>2k</b><br/>cg-22;24</p>          |  | <p>40</p> <p>Molecular Formula = <math>C_{19}H_{15}N_3O_3</math><br/>Formula Weight = 333.3407</p>         |
| <p><b>2l</b><br/>cg-32</p>             |  | <p>119</p> <p>Molecular Formula = <math>C_{19}H_{15}N_3O_2</math><br/>Formula Weight = 317.3413</p>        |

|                            |                                                                                    |                                                                                                                                      |
|----------------------------|------------------------------------------------------------------------------------|--------------------------------------------------------------------------------------------------------------------------------------|
| <p><b>2n</b><br/>cg-37</p> | 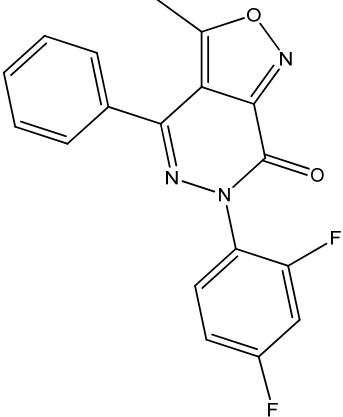  | <p>196</p> <p>Chemical Formula: C<sub>18</sub>H<sub>11</sub>F<sub>2</sub>N<sub>3</sub>O<sub>2</sub><br/>Molecular Weight: 339.30</p> |
| <p><b>2m</b><br/>cg-38</p> |  | <p>78.8</p> <p>Molecular Formula = C<sub>18</sub>H<sub>12</sub>FN<sub>3</sub>O<sub>2</sub><br/>Formula Weight = 321.3051832</p>      |

9. 6-(3,5-dichlorophenyl)-3-methyl-4-phenylisoxazolo[3,4-d]pyridazin-7(6H)-one. 2j.

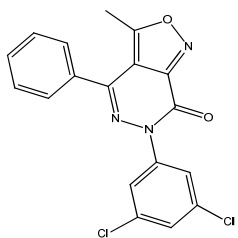

<sup>1</sup>H NMR (400 MHz, CDCl<sub>3</sub>): δ 7.68 (2H); 7.57 (5H); 7.38 (1H); 5.59 (s, 3H). <sup>13</sup>C NMR: δ 208.20, 194.33, 181.58, 170.91, 164.94, 152.67, 152.0, 142.11, 140.73, 134.83, 134.57, 131.20, 129.26, 127.0, 126.65, 125.57, 124.22, 122.62, 112.46, 31.42, 28.65, 18.92. HRMS Calc'd for C<sub>18</sub>H<sub>11</sub>Cl<sub>2</sub>N<sub>3</sub>O<sub>2</sub>+H 372.0307, Found: 372.0309. 0.5 ppm.

A. <sup>1</sup>H NMR

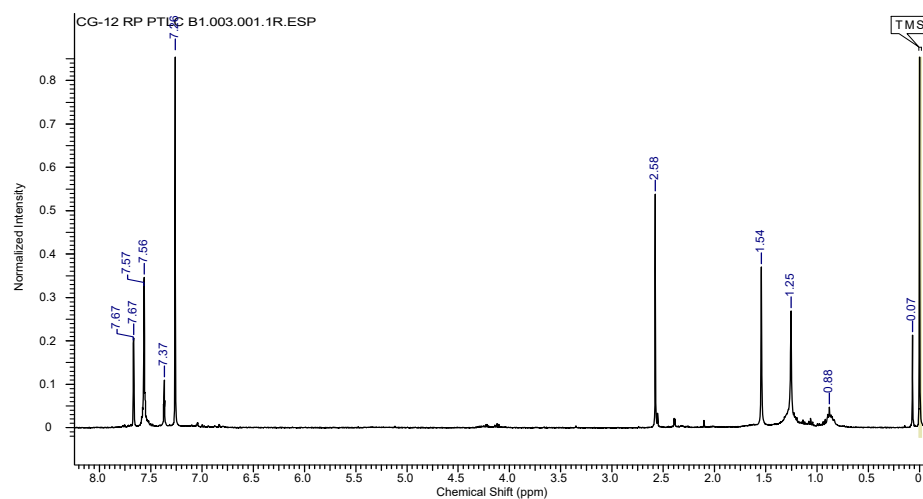

### B. $^1\text{H}$ NMR Aromatic expanded

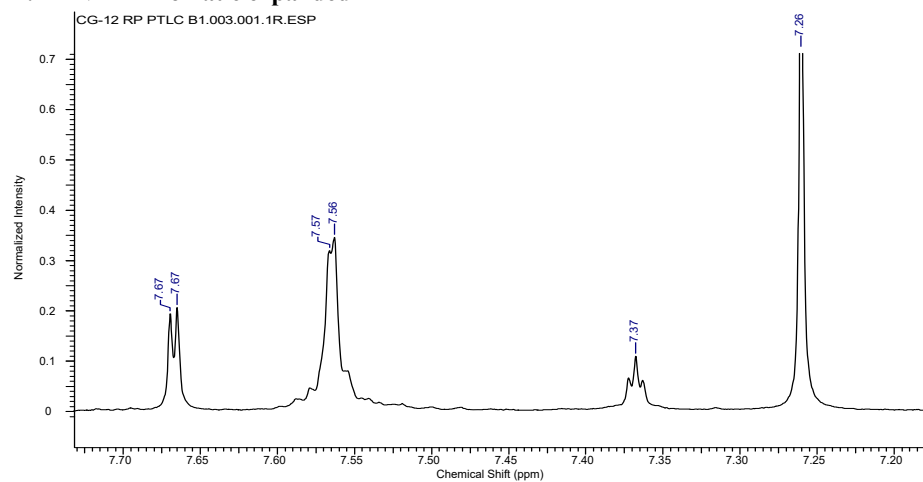

### C. $^{13}\text{C}$ NMR

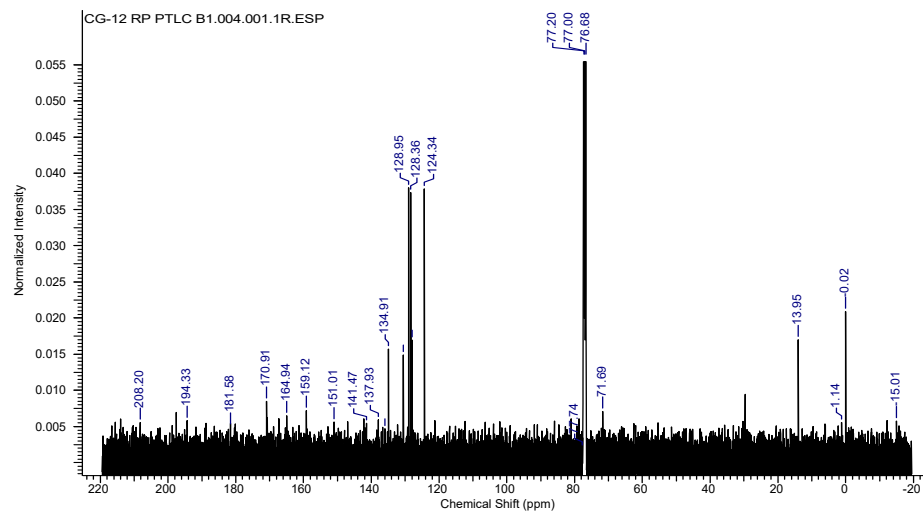

### D. $^{13}\text{C}$ NMR zoom

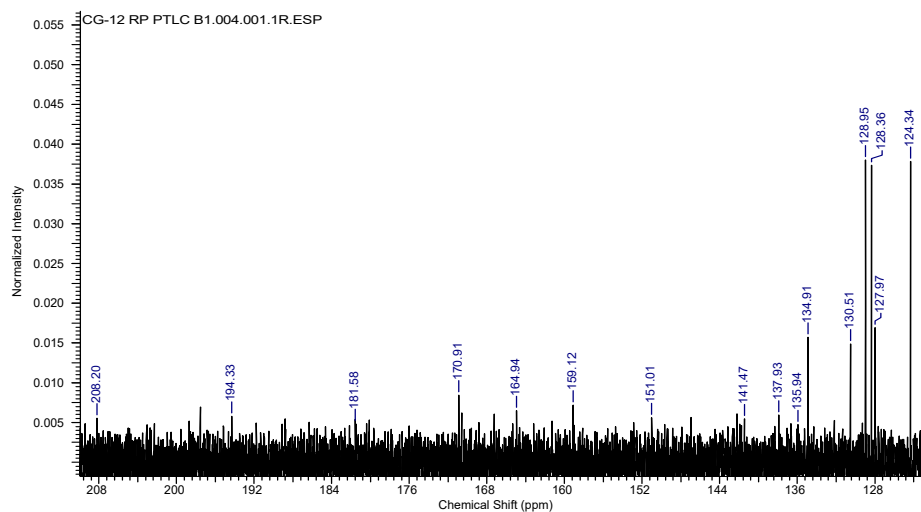

11. 6-(4-methoxyphenyl)-3-methyl-4-phenyl-6H,7H-[1,2]oxazolo[3,4-d]pyridazin-7-one, 2k.

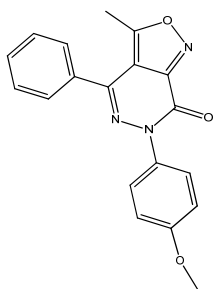

$^1\text{H}$  NMR (400 MHz,  $\text{CDCl}_3$ ):  $\delta$  7.58-7.53 (t,  $J=8,7\text{H}$ ); 7.00-6.98(d,  $J=8,2\text{H}$ ); 3.85(s, 3H); 2.58 (s, 3H).  $^{13}\text{C}$  NMR 170.38; 159.0; 152.82; 152.73; 142.63; 133.77; 130.11; 28.76; 128.40; 127.02; 114.03; 111.37; 55.52; 13.92  $\text{C}_{19}\text{H}_{15}\text{N}_3\text{O}_3$  MW: 333.35; HRMS  $m/z$ : 333.1113 (100.0%), 334.1147 (20.5%), 335.1181 (2.0%), 334.1084 (1.1%); Calc'd for  $\text{C}_{19}\text{H}_{15}\text{N}_3\text{O}_3$  333.3407, Found: 333.1113.

A.  $^1\text{H}$  NMR

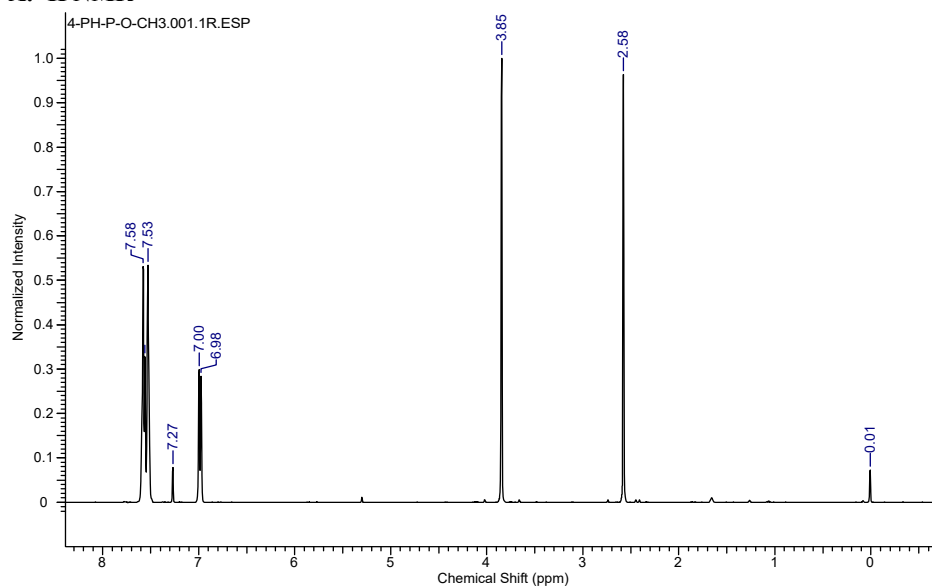

B.  $^1\text{H}$  NMR Aromatic expanded

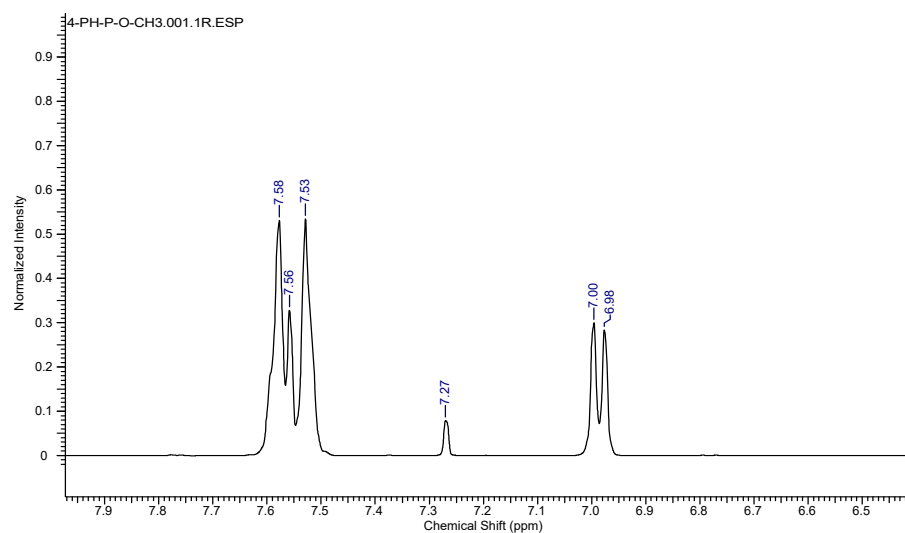

### C. <sup>13</sup>C NMR

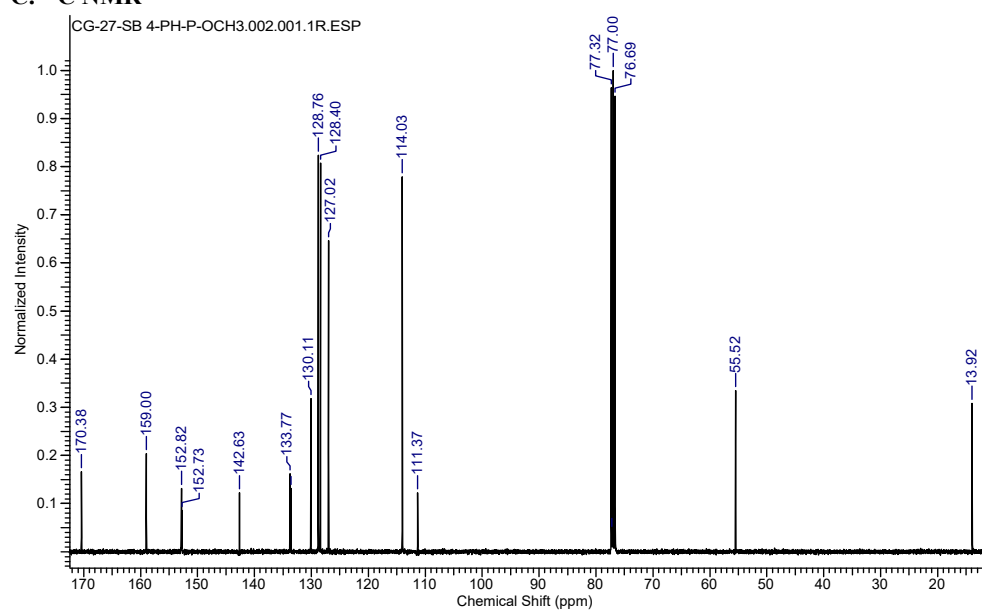

### D. <sup>13</sup>C NMR zoom

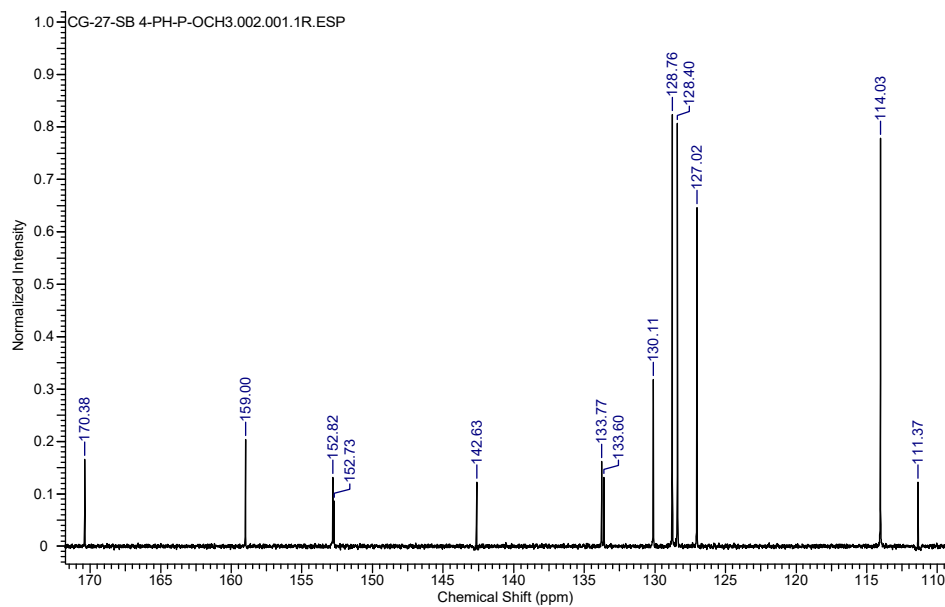

12. 3-methyl-6-(4-methylphenyl)-4-phenyl-6H,7H-[1,2]oxazolo[3,4-d]pyridazin-7-one, 2l.

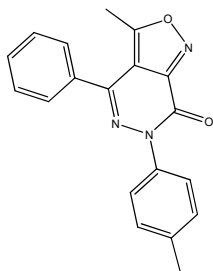

$^1\text{H}$  NMR (400 MHz,  $\text{CDCl}_3$ ):  $\delta$  7.60-7.58 (m,  $J=4$ , 2H); 7.55-7.53 (t,  $J=4$ , 5H); 2.59 (s, 3H); 2.40 (s, 3H).  $^{13}\text{C}$  NMR 170.58; 152.75; 133.48; 130.30; 128.87; 128.38; 127.68; 115.82; 115.60; 111.40; 13.95  $\text{C}_{19}\text{H}_{15}\text{N}_3\text{O}_2$  MW: 317.34; HRMS  $m/z$  Calc'd for  $\text{C}_{19}\text{H}_{15}\text{N}_3\text{O}_2$  317.3413, Found: 317.1164.

A.  $^1\text{H}$  NMR

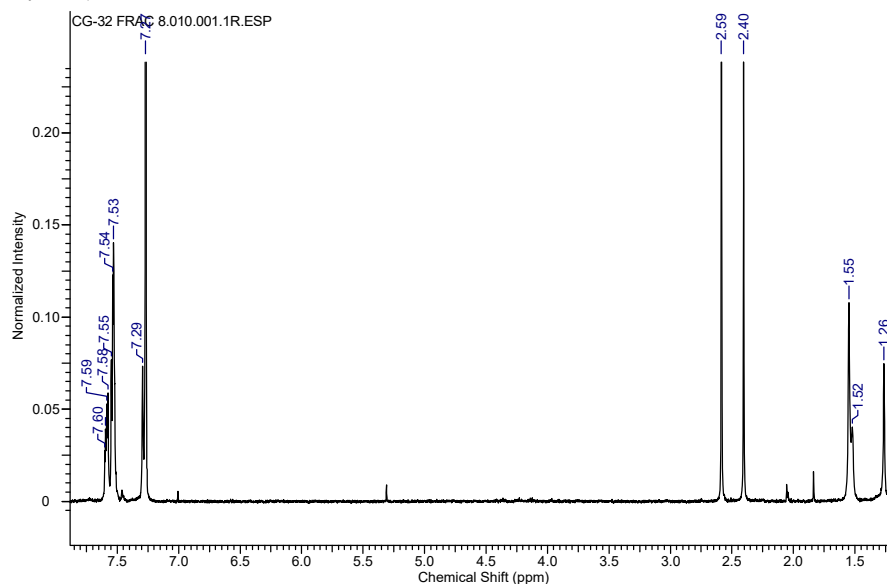

B.  $^1\text{H}$  NMR Aromatic expanded



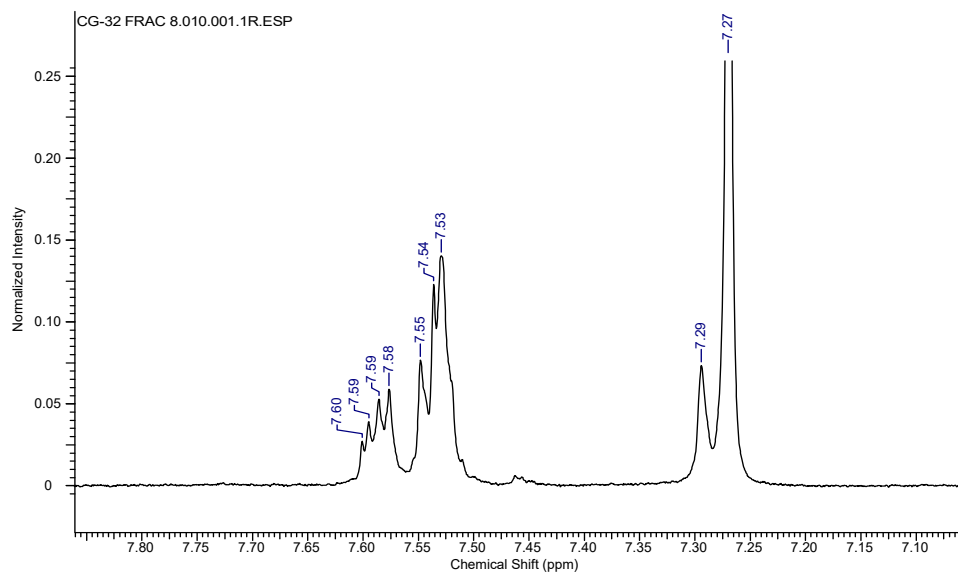

### C. $^{13}\text{C}$ NMR

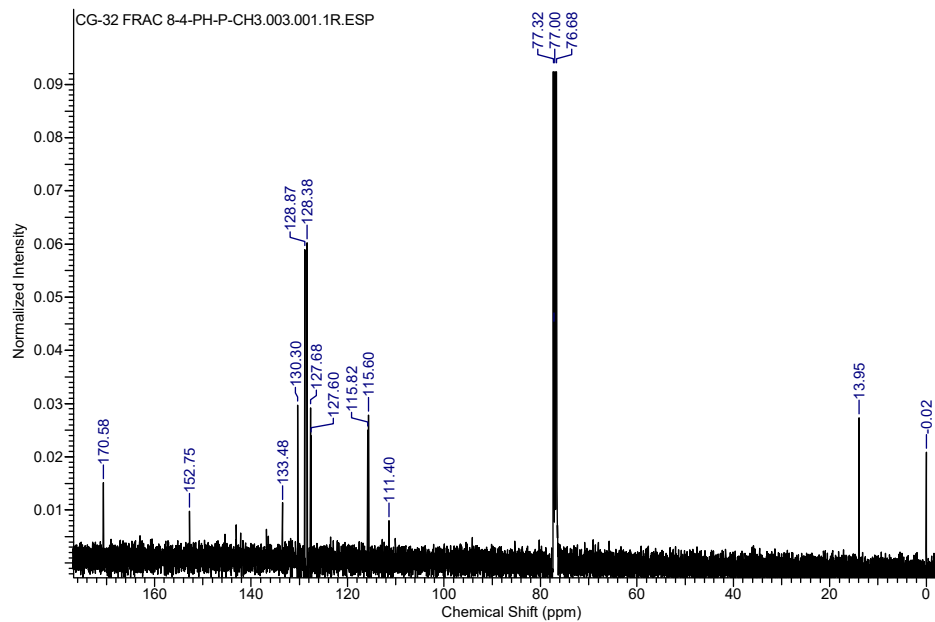

### D. $^{13}\text{C}$ NMR zoom

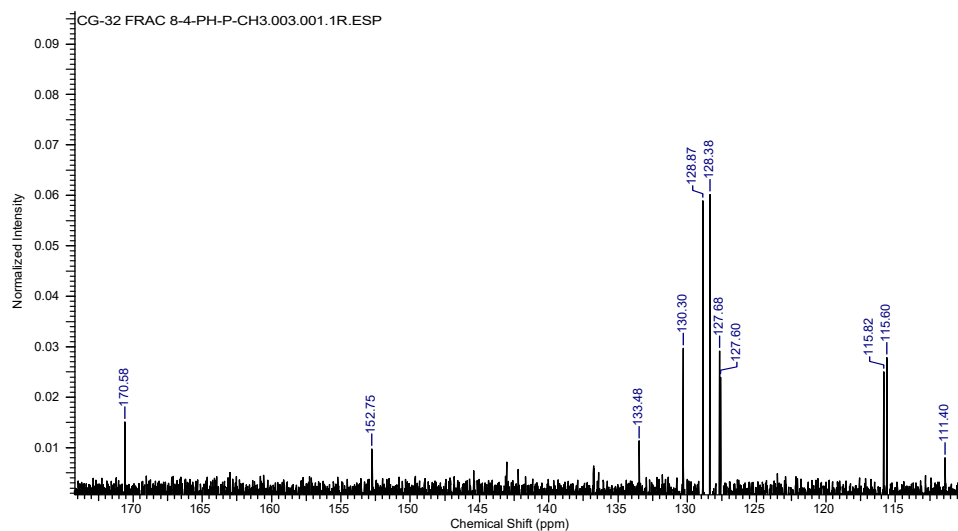

15. 6-[3,5-bis(trifluoromethyl)phenyl]-3-methyl-4-phenyl[1,2]oxazolo[3,4-d]pyridazin-7(6H)-one,

.j.

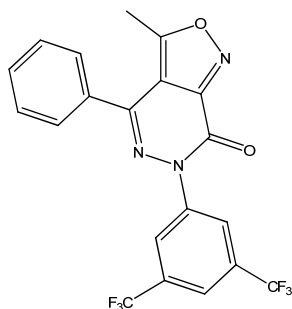

$^1\text{H}$  NMR (400 MHz,  $\text{CHCl}_3$ -d)  $\delta$  ppm 8.25 - 8.26 (m, 2 H) 7.87 - 7.88 (m, 1 H) 7.59 (s, 5 H) 2.60 - 2.60 (m, 3 H);  $^{13}\text{C}$  NMR:  $\delta$  171.23, 152.78, 152.43, 144.33, 144.91, 132.96, 132.37, 132.03, 130.96, 129.01, 128.35; 125.82, 121.35, 111.29, 13.96. Chemical Formula:  $\text{C}_{20}\text{H}_{11}\text{F}_6\text{N}_3\text{O}_2$ ; Exact Mass: 439.0755; Molecular Weight: 439.3107;  $m/z$ : 439.0755 (100.0%), 440.0789 (21.6%), 441.0823 (2.2%), 440.0726 (1.1%) Found: 439.08

#### A. $^1\text{H}$ NMR

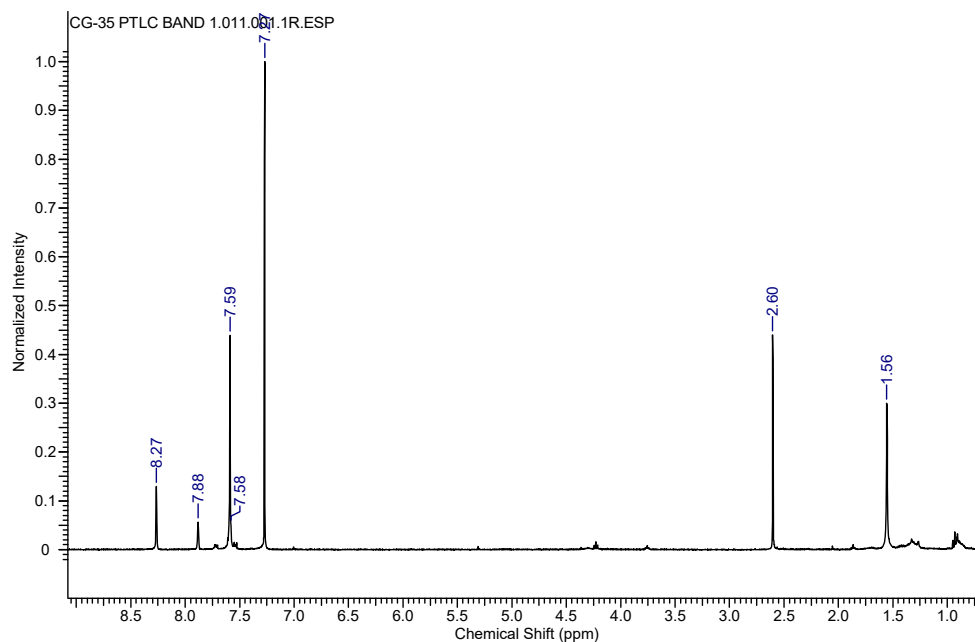**B.  $^1\text{H}$  NMR Aromatic expanded**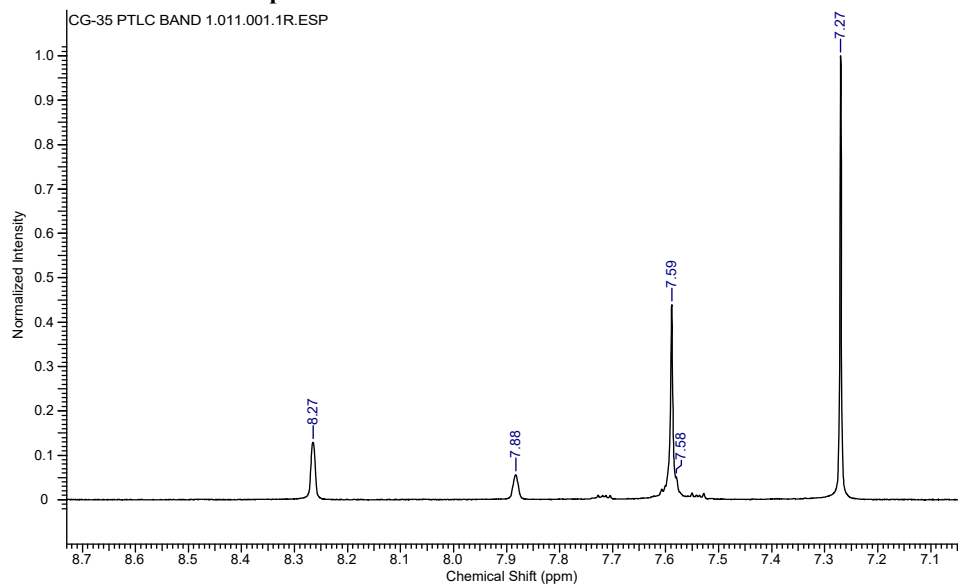**C.  $^{13}\text{C}$  NMR**

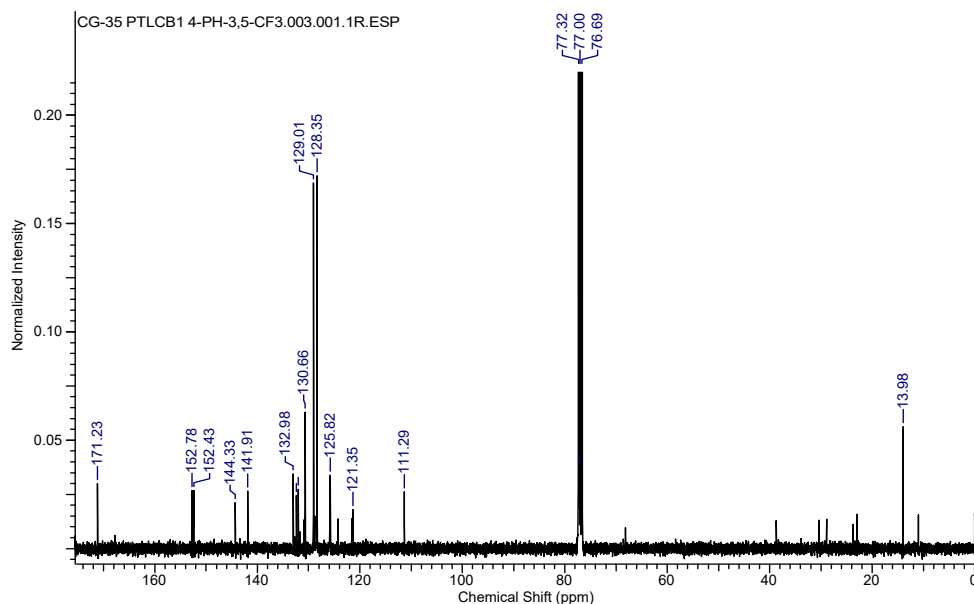

#### D. $^{13}\text{C}$ NMR zoom

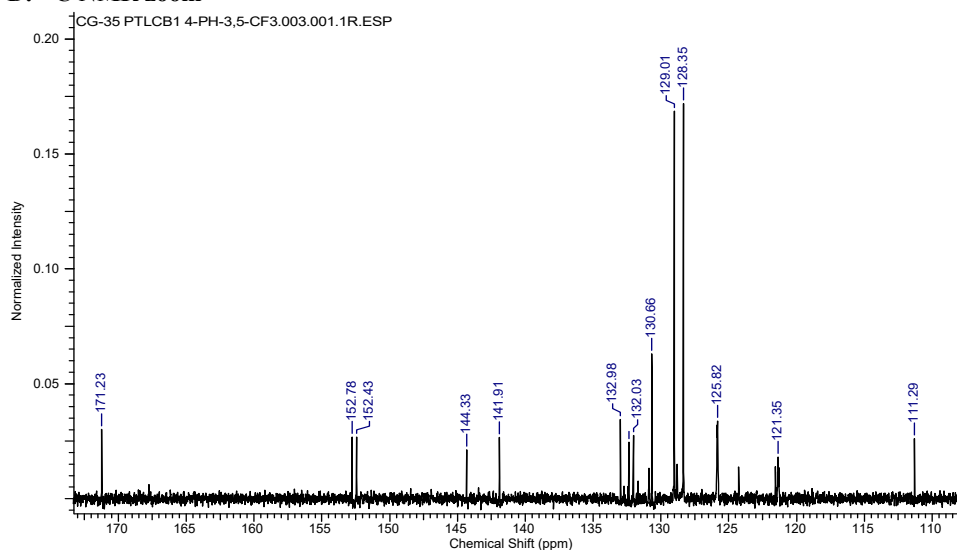

#### 16. 6-(4-fluorophenyl)-3-methyl-4-phenyl[1,2]oxazolo[3,4-d]pyridazin-7(6H)-one, **2m**.

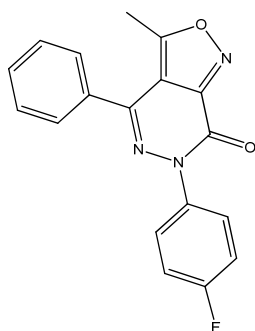

$^1\text{H}$  NMR (400 MHz,  $\text{CHLOROFORM-d}$ )  $\delta$  ppm 7.66 (dd,  $J=7.34, 5.26$  Hz, 2H) 7.58 (br. s., 2 H) 7.55 (m, 3 H) 7.17 (t,  $J=8.01$  Hz, 2 H) 2.59 (s, 1 H),  $^{13}\text{C}$  NMR:  $\delta$  170.29, 152.89, 152.71, 142.62, 138.31, 137.96, 133.68, 130.13, 129.44, 128.78, 128.43; 125.61, 111.40, 21.16, 13.94,  $\text{C}_{18}\text{H}_{12}\text{FN}_3\text{O}_2$ , Exact Mass: 321.0914, Molecular Weight: 321.3052,  $m/z$ : 321.0914 (100.0%), 322.0947 (19.5%), 323.0981 (1.8%), 322.0884 (1.1%), Found: 322.0970

**A.  $^1\text{H}$  NMR**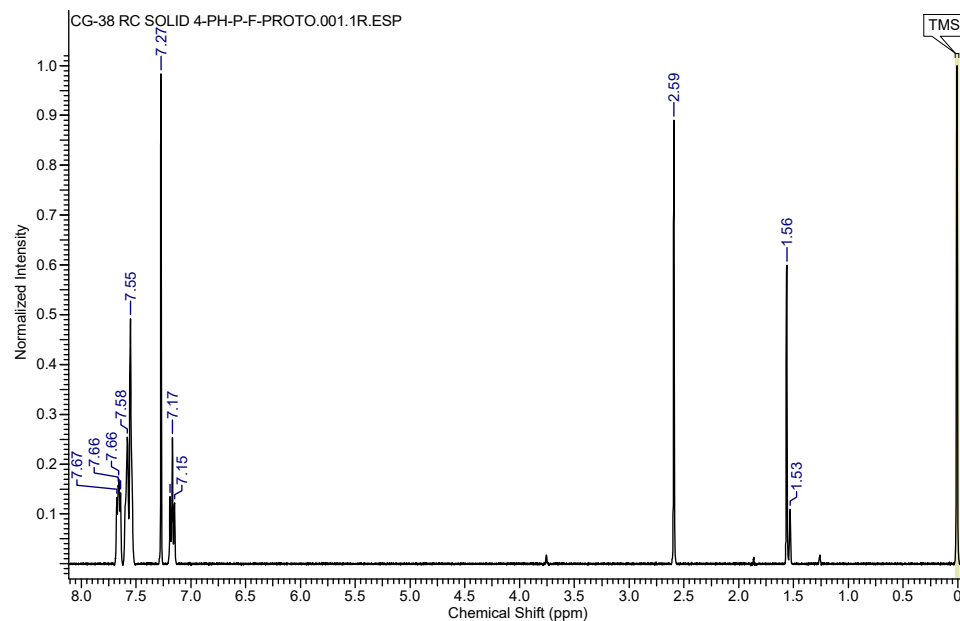**B.  $^1\text{H}$  NMR Aromatic expanded**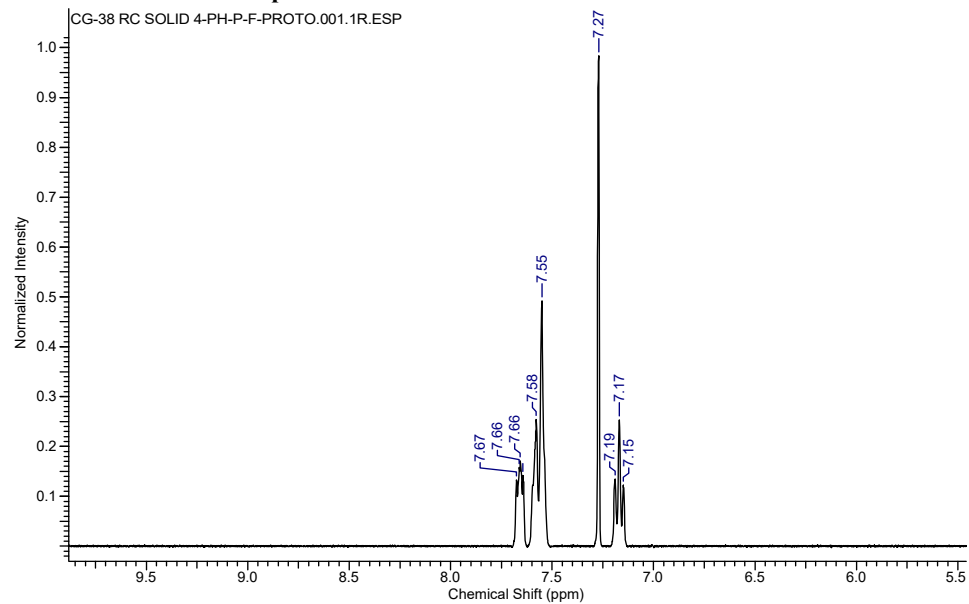**C.  $^{13}\text{C}$  NMR**

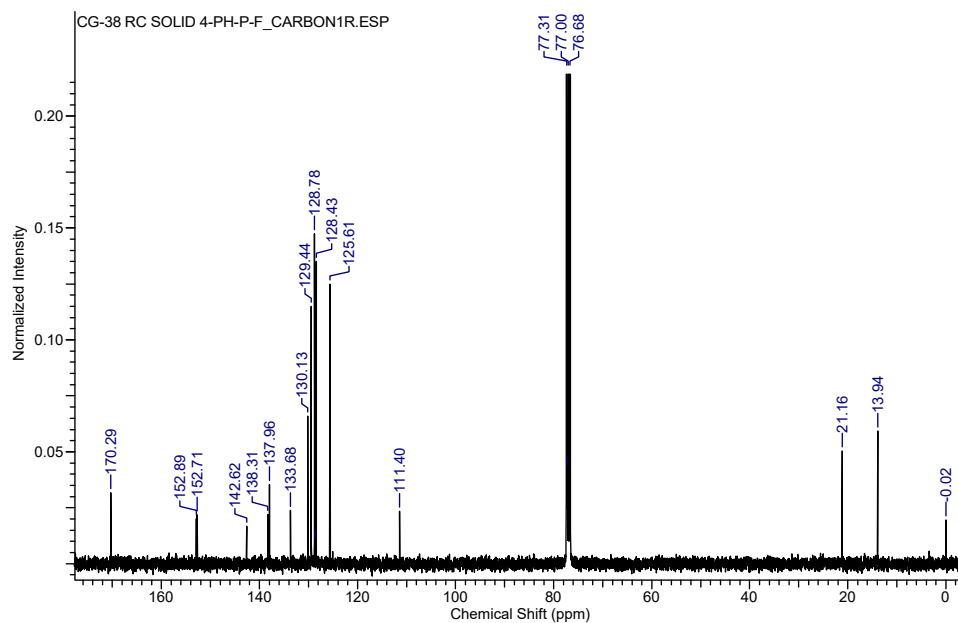

#### D. $^{13}\text{C}$ NMR zoom

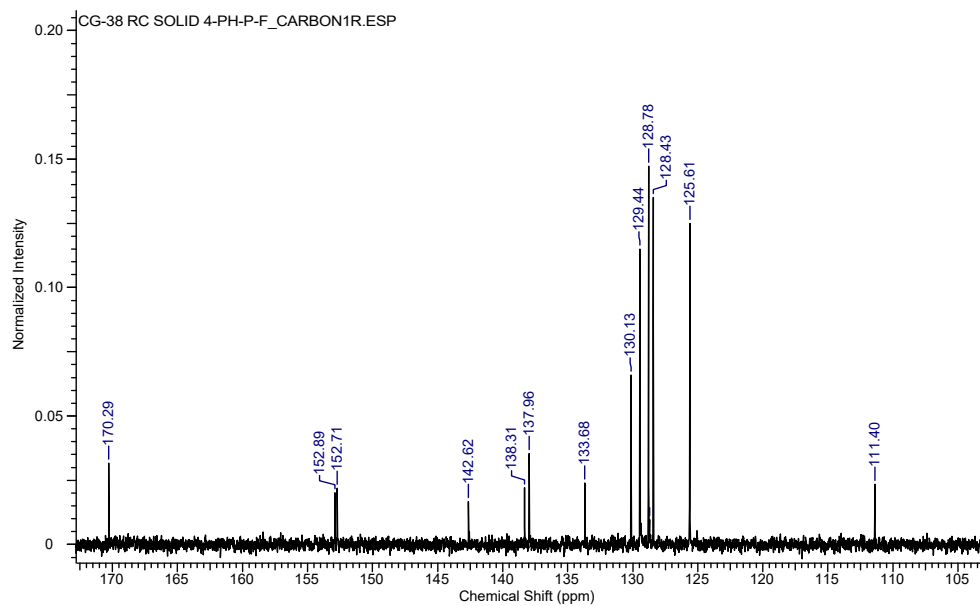

#### 17. 6-(2,4-difluorophenyl)-3-methyl-4-phenyl[1,2]oxazolo[3,4-d]pyridazin-7(6H)-one, **2n**.

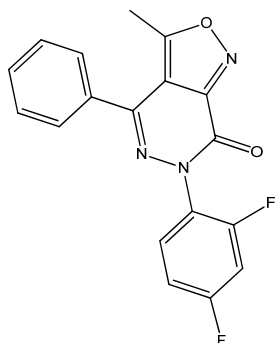

$^1\text{H}$  NMR (400 MHz,  $\text{CHCl}_3$ - $d$ )  $\delta$  7.54 (br. s., 6 H) 7.01 (t,  $J=8.38$  Hz, 2H) 2.58 (s, 3 H),  $^{13}\text{C}$  NMR:  $\delta$  170.82, 164.06, 163.95, 161.45, 158.99, 158.87, 156.46, 156.33, 152.48, 152.27, 143.60, 133.21, 130.35, 128.88, 128.39, 124.99, 124.86, 124.82, 111.96, 111.74, 111.53, 105.35, 105.12, 105.09, 104.86, 13.89.  $\text{C}_{18}\text{H}_{11}\text{F}_2\text{N}_3\text{O}_2$  Exact Mass: 339.0819 Molecular Weight: 339.2956  $m/z$ : 339.0819 (100.0%), 340.0853 (19.5%), 341.0886 (1.8%), 340.0790 (1.1%), Found: 340.0895

#### A. $^1\text{H}$ NMR

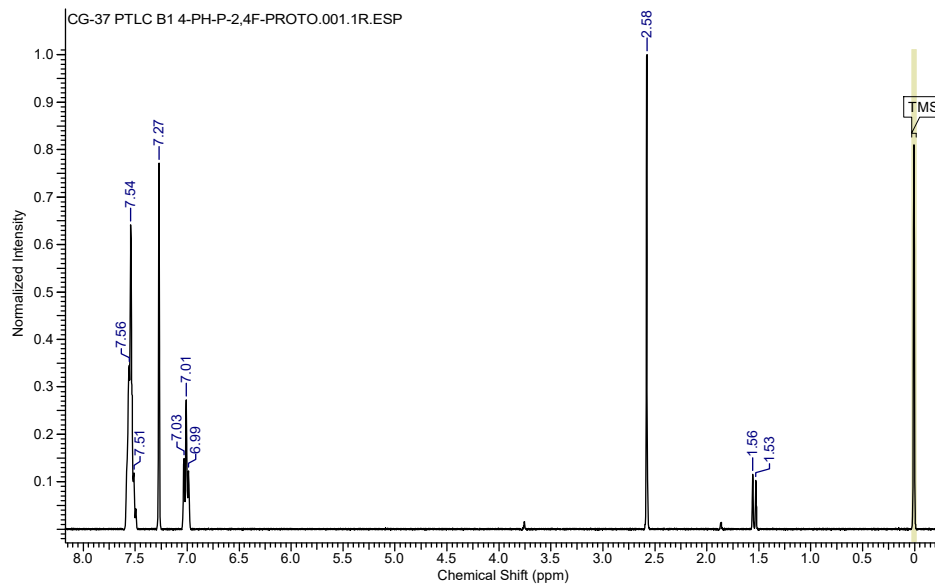

#### B. $^1\text{H}$ NMR Aromatic expanded

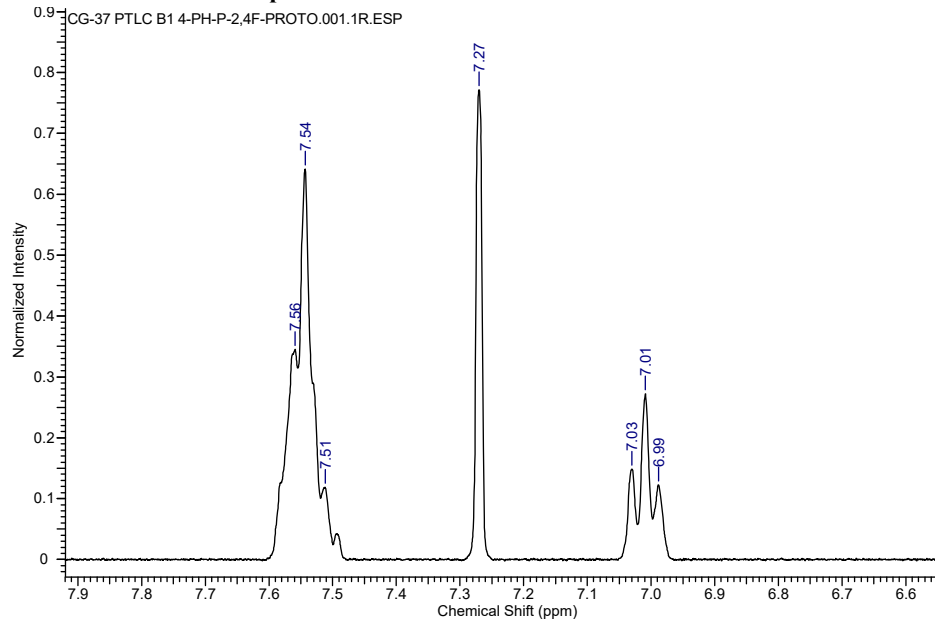

#### C. $^{13}\text{C}$ NMR

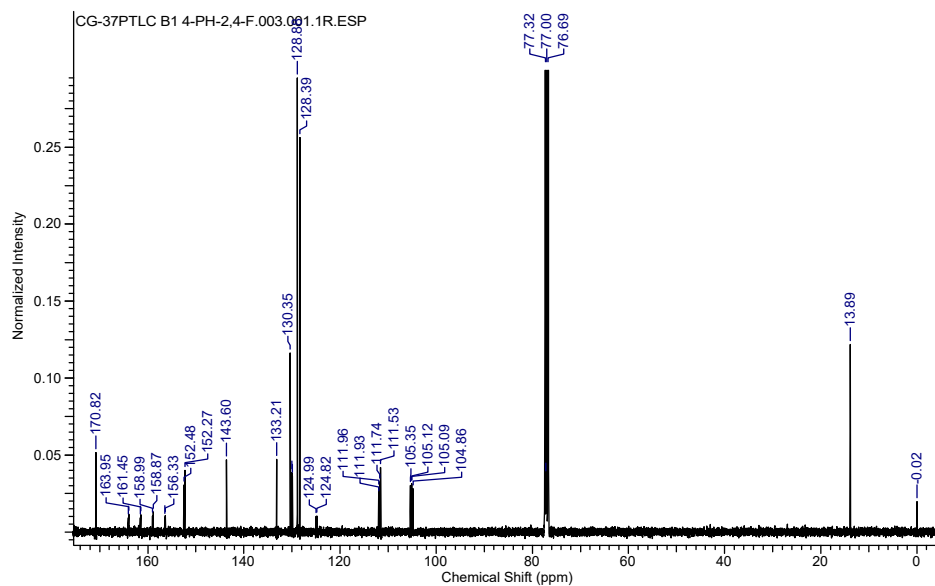

#### D. $^{13}\text{C}$ NMR zoom

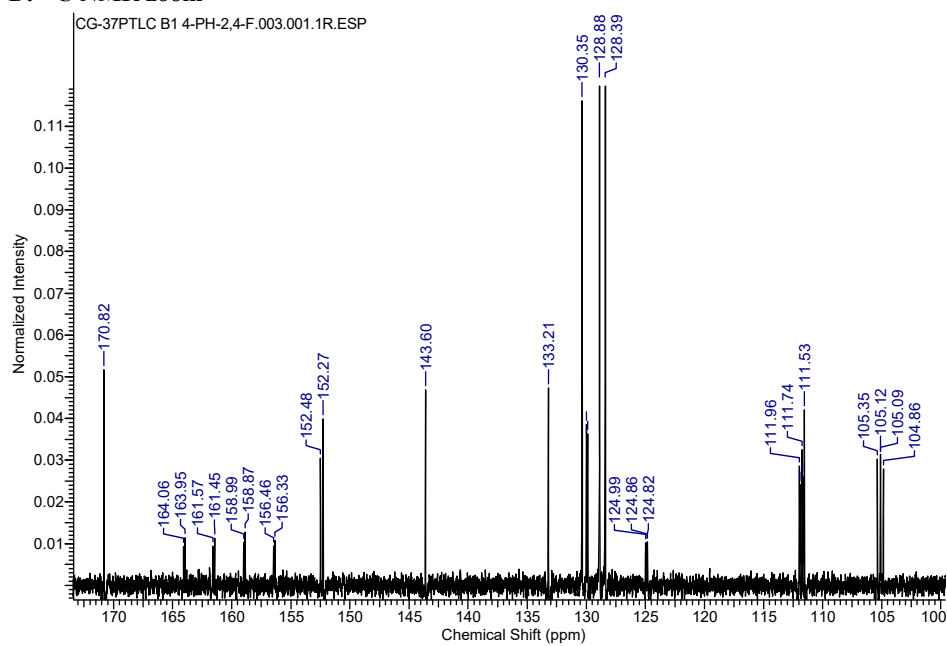

Supplement: s1 [file s1]
